# Supplementary material for: Preparative separation of α- and β-santalenes and (Z)-α- and (Z)-β-santalols using silver nitrate-impregnated silica gel medium pressure liquid chromatography and analysis of sandalwood oil
Source: Royal Society of Chemistry journal article supplement (doi:10.1039/c2an35575b), 2012-01-01
Supplement: c2an35575b.pdf [file c2an35575b.pdf]

## Supporting Information

# Preparative Separation of $\alpha$ - and $\beta$ -Santalenes and (Z)- $\alpha$ - and (Z)- $\beta$ -Santalols using Silver Nitrate-Impregnated Silica Gel Medium Pressure Liquid Chromatography and Analysis of Sandalwood Oil

Pankaj P. Daramwar <sup>a</sup>, Prabhakar Lal Srivastava <sup>a</sup>, Balaraman Priyadarshini<sup>a</sup>, Hirekodathakallu V. Thulasiram <sup>a, b\*</sup>

<sup>a</sup> Chemistry-Biology Unit, Division of Organic Chemistry, National Chemical Laboratory, Council of Scientific and Industrial Research (CSIR), Pune 411008, India

<sup>b</sup> Institute of Genomics and Integrative Biology, Council of Scientific and Industrial Research (CSIR), Mall Road, New Delhi-110007, India

\* **Corresponding author:**

Dr. Thulasiram H. V.  
National Chemical Laboratory, Pune 411008, India  
Telephone +91 20 25902478  
Fax +91 20 25902629  
E mail: hv.thulasiram@ncl.res.in

| <b>Contents</b>                                                                                | <b>Page no.</b> |
|------------------------------------------------------------------------------------------------|-----------------|
| <b>Fig S1:</b> $^1\text{H}$ NMR spectrum of <b>1</b> in $\text{CDCl}_3$ at 500 MHz.            | 4               |
| <b>Fig S2:</b> $^{13}\text{C}$ NMR spectrum of <b>1</b> in $\text{CDCl}_3$ at 125 MHz.         | 5               |
| <b>Fig S3:</b> DEPT NMR spectrum of <b>1</b> in $\text{CDCl}_3$ at 125 MHz.                    | 6               |
| <b>Fig S4:</b> $^1\text{H}$ NMR spectrum of <b>2 &amp; 3</b> in $\text{CDCl}_3$ at 500 MHz.    | 7               |
| <b>Fig S5:</b> $^{13}\text{C}$ NMR spectrum of <b>2 &amp; 3</b> in $\text{CDCl}_3$ at 125 MHz. | 8               |
| <b>Fig S6:</b> DEPT NMR spectrum of <b>2 &amp; 3</b> in $\text{CDCl}_3$ at 125 MHz.            | 9               |
| <b>Fig S7:</b> $^1\text{H}$ NMR spectrum of <b>4</b> in $\text{CDCl}_3$ at 200 MHz.            | 10              |
| <b>Fig S8:</b> $^{13}\text{C}$ NMR spectrum of <b>4</b> in $\text{CDCl}_3$ at 50 MHz.          | 11              |
| <b>Fig S9:</b> DEPT NMR spectrum of <b>4</b> in $\text{CDCl}_3$ at 50 MHz.                     | 12              |
| <b>Fig S10:</b> $^1\text{H}$ NMR spectrum of <b>5</b> in $\text{CDCl}_3$ at 500 MHz.           | 13              |
| <b>Fig S11:</b> $^{13}\text{C}$ NMR spectrum of <b>5</b> in $\text{CDCl}_3$ at 125 MHz.        | 14              |
| <b>Fig S12:</b> DEPT NMR spectrum of <b>5</b> in $\text{CDCl}_3$ at 125 MHz.                   | 15              |

|                                                                                                                            |         |
|----------------------------------------------------------------------------------------------------------------------------|---------|
| <b>Fig S13:</b> $^1\text{H}$ NMR spectrum of <b>6 &amp; 7</b> in $\text{CDCl}_3$ at 500 MHz.                               | 16      |
| <b>Fig S14:</b> $^{13}\text{C}$ NMR spectrum of <b>6 &amp; 7</b> in $\text{CDCl}_3$ at 125 MHz.                            | 17      |
| <b>Fig S15:</b> DEPT NMR spectrum of <b>6 &amp; 7</b> in $\text{CDCl}_3$ at 125 MHz.                                       | 18      |
| <b>Fig S16:</b> $^1\text{H}$ NMR spectrum of <b>11</b> in $\text{CDCl}_3$ at 200 MHz.                                      | 19      |
| <b>Fig S17:</b> $^{13}\text{C}$ NMR spectrum of <b>11</b> in $\text{CDCl}_3$ at 50 MHz.                                    | 20      |
| <b>Fig S18:</b> DEPT NMR spectrum of <b>11</b> in $\text{CDCl}_3$ at 50 MHz.                                               | 21      |
| <b>Fig S19:</b> Standard graphs for purified components ( <b>1, 2 &amp; 3, 4, 5, 6 &amp; 7, 8, 9, 11</b> ).                | 22 & 23 |
| <b>Fig S20:</b> Co-injection of purified components ( <b>1, 2 &amp; 3, 4, 5, 6 &amp; 7, 8, 9, 11</b> ) with Sandalwood oil | 24 & 25 |

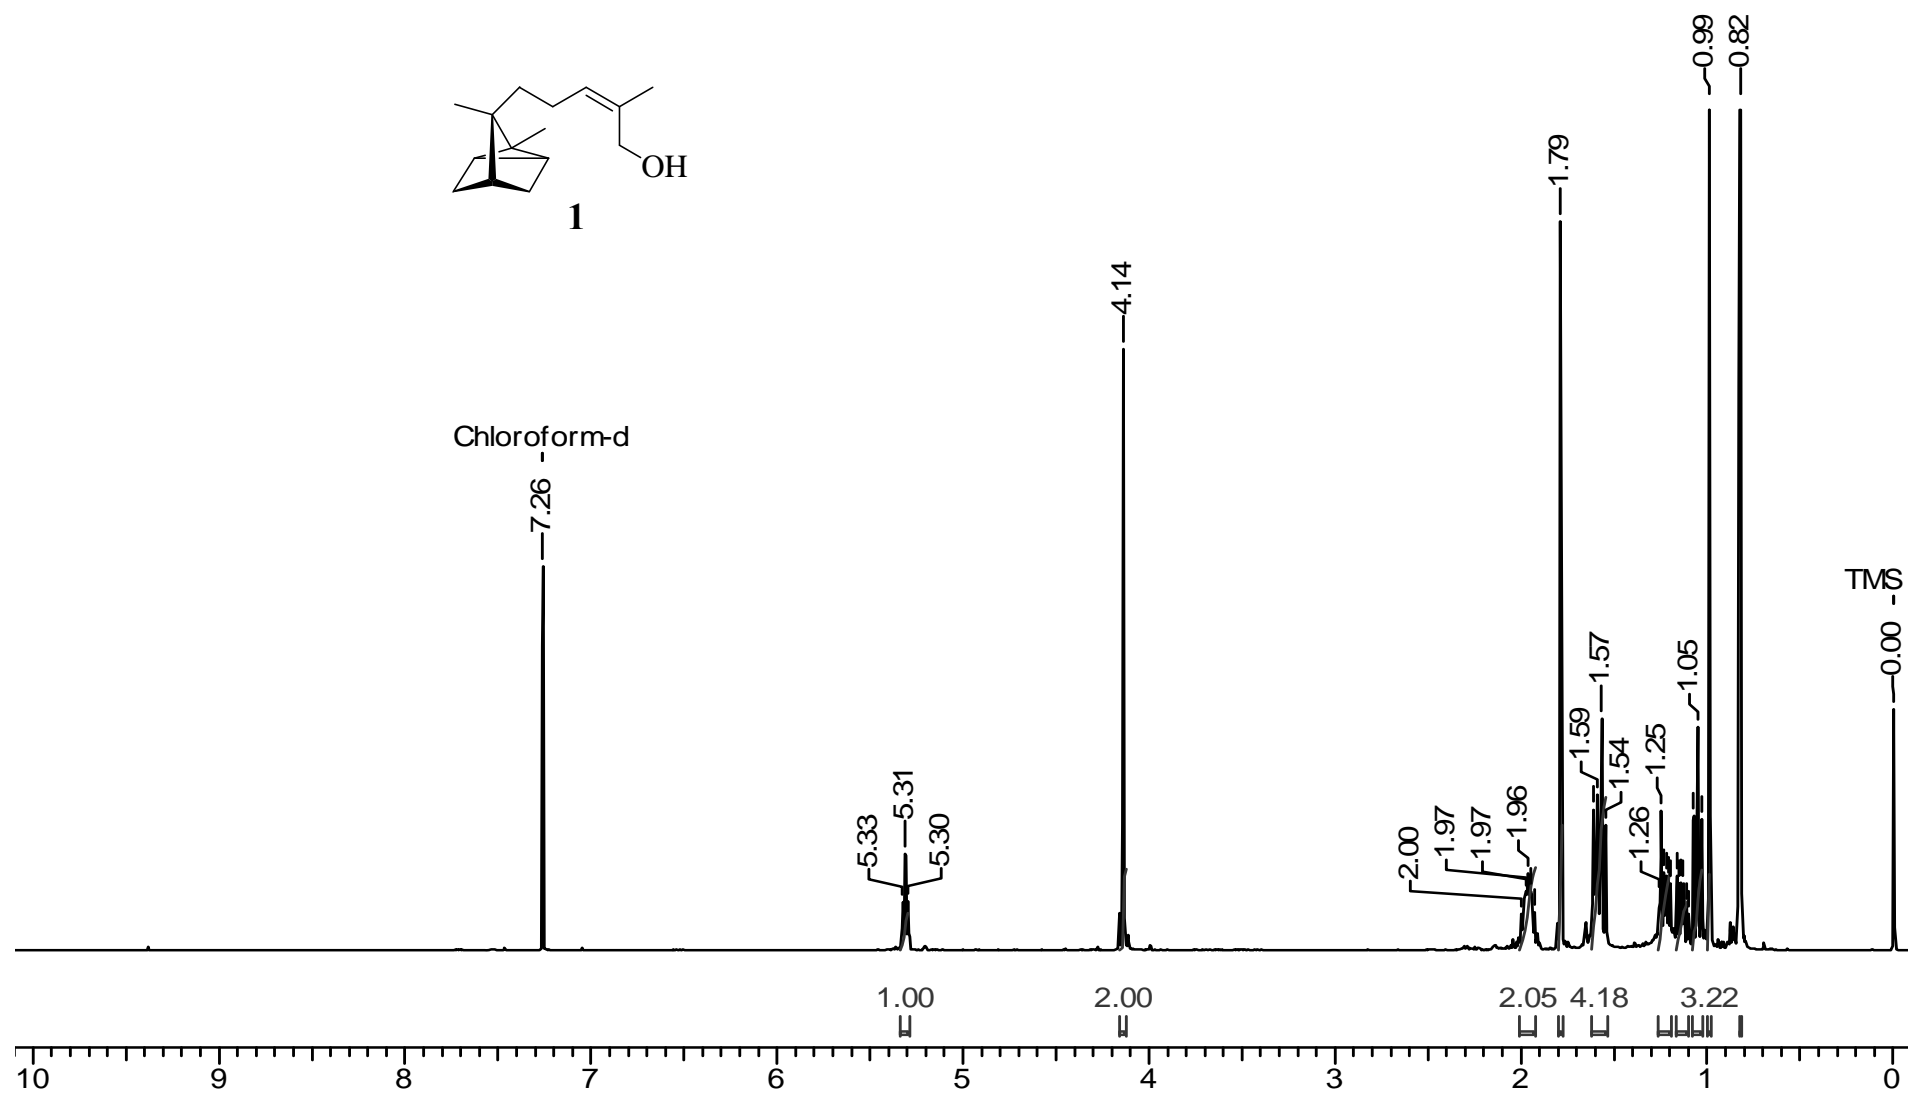

Fig S1: <sup>1</sup>H NMR spectrum of **1** in CDCl<sub>3</sub> at 500 MHz.

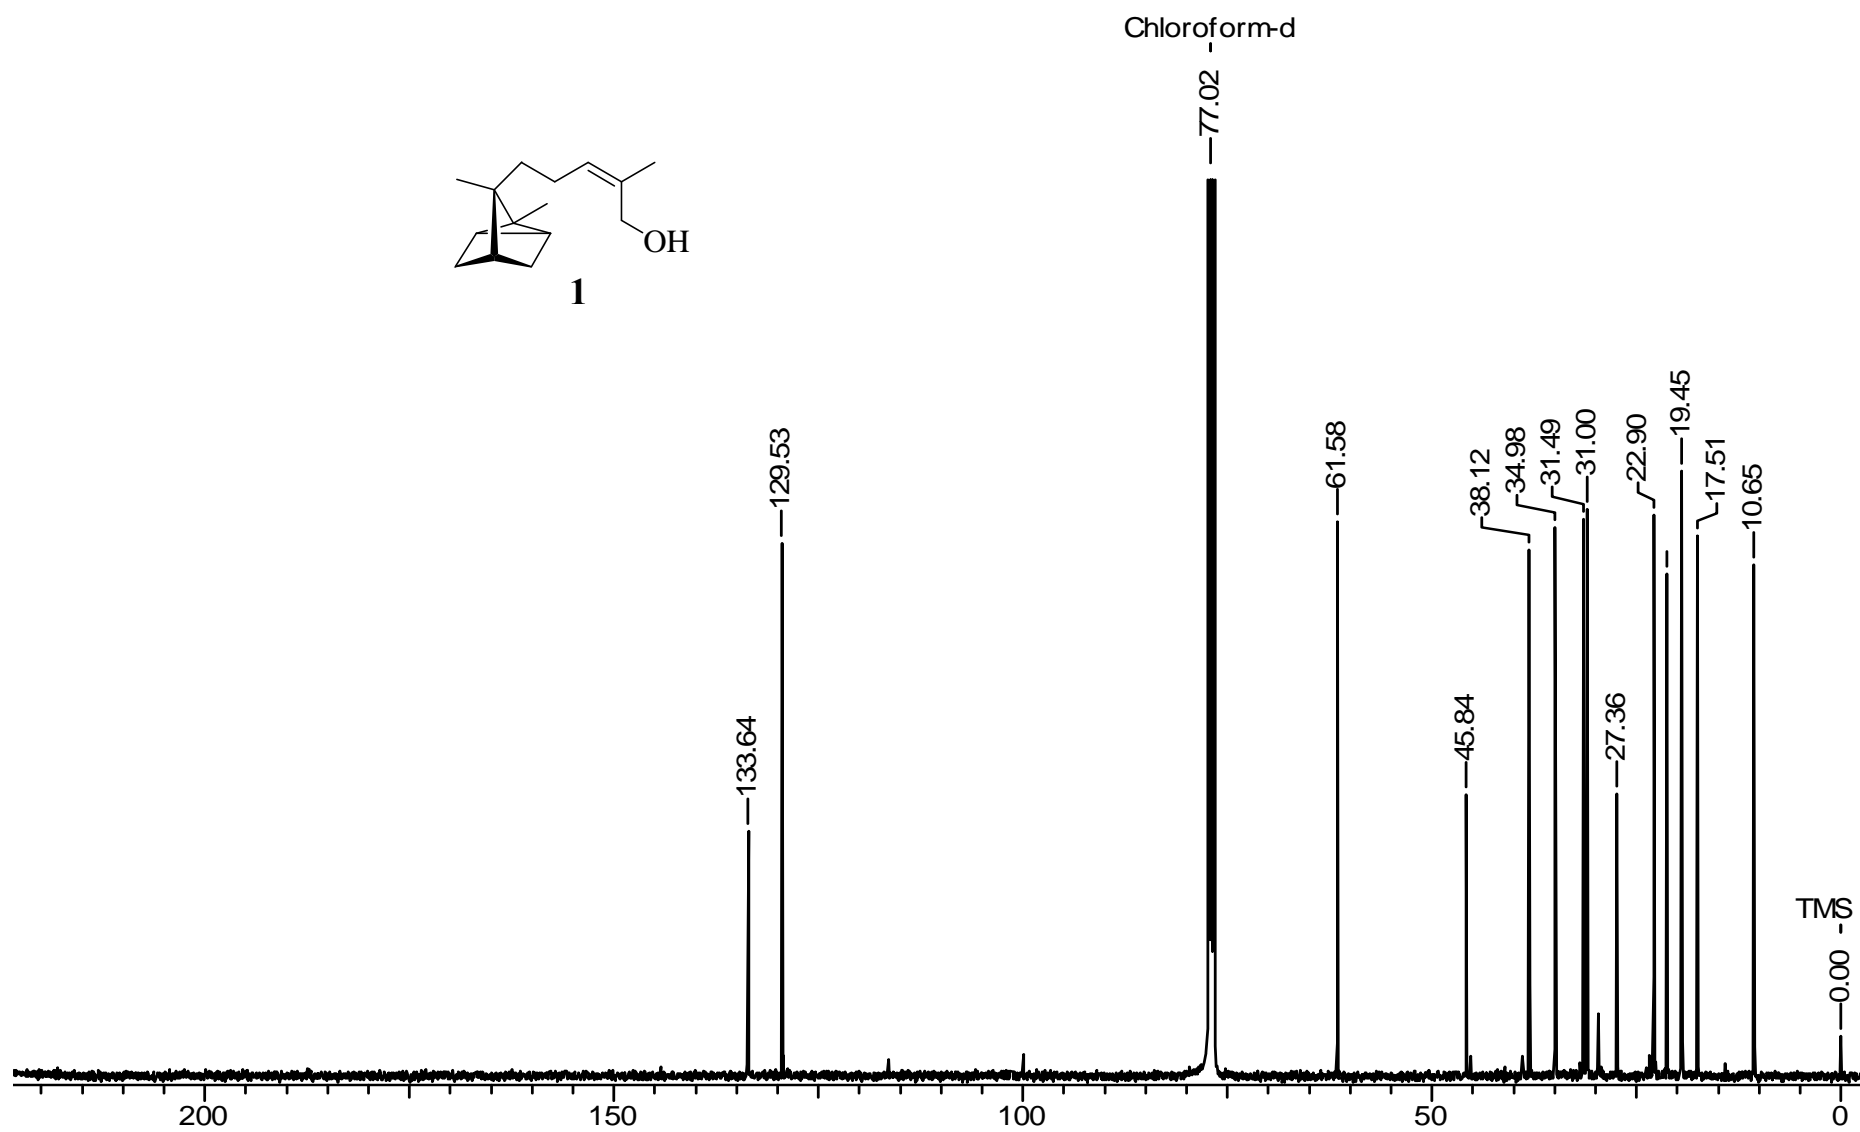

Fig S2: <sup>13</sup>C NMR spectrum of **1** in CDCl<sub>3</sub> at 125 MHz.

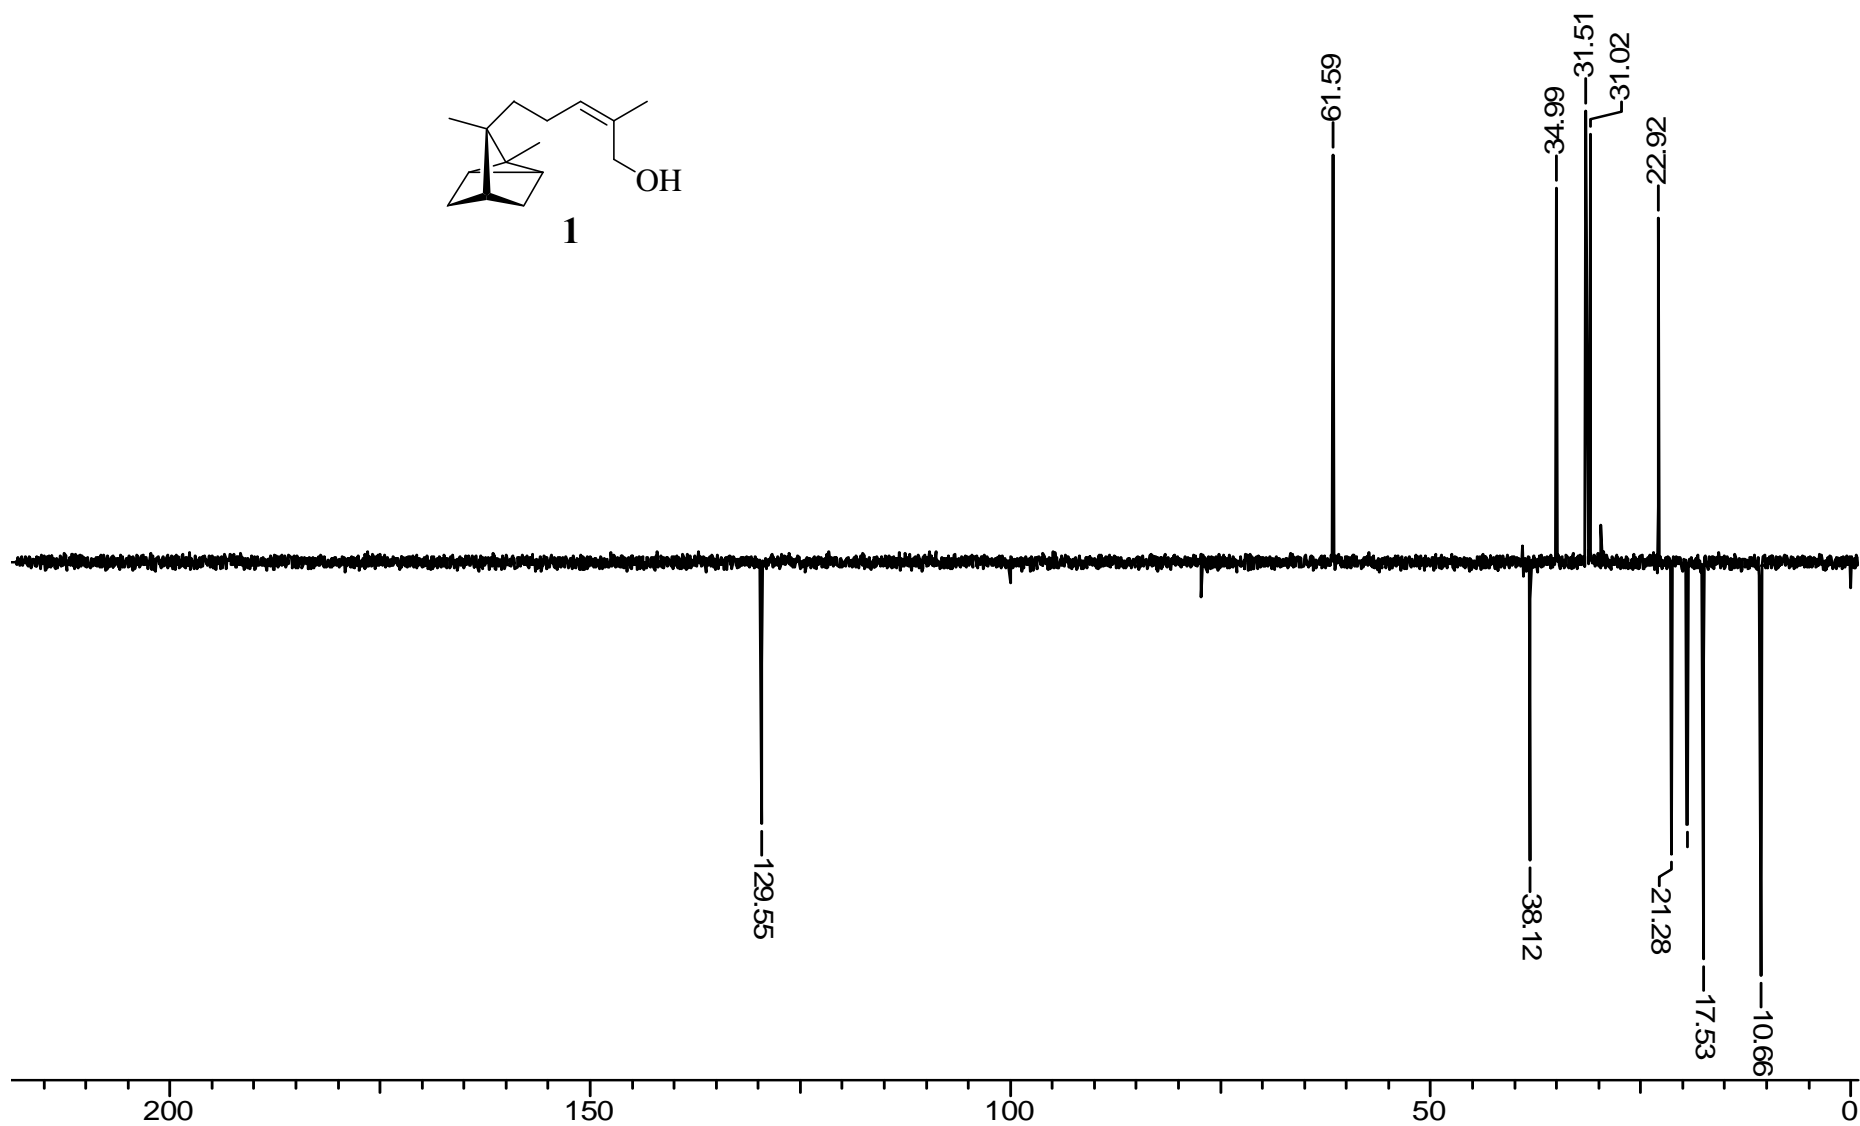

**Fig S3:** DEPT NMR spectrum of **1** in CDCl<sub>3</sub> at 125 MHz.

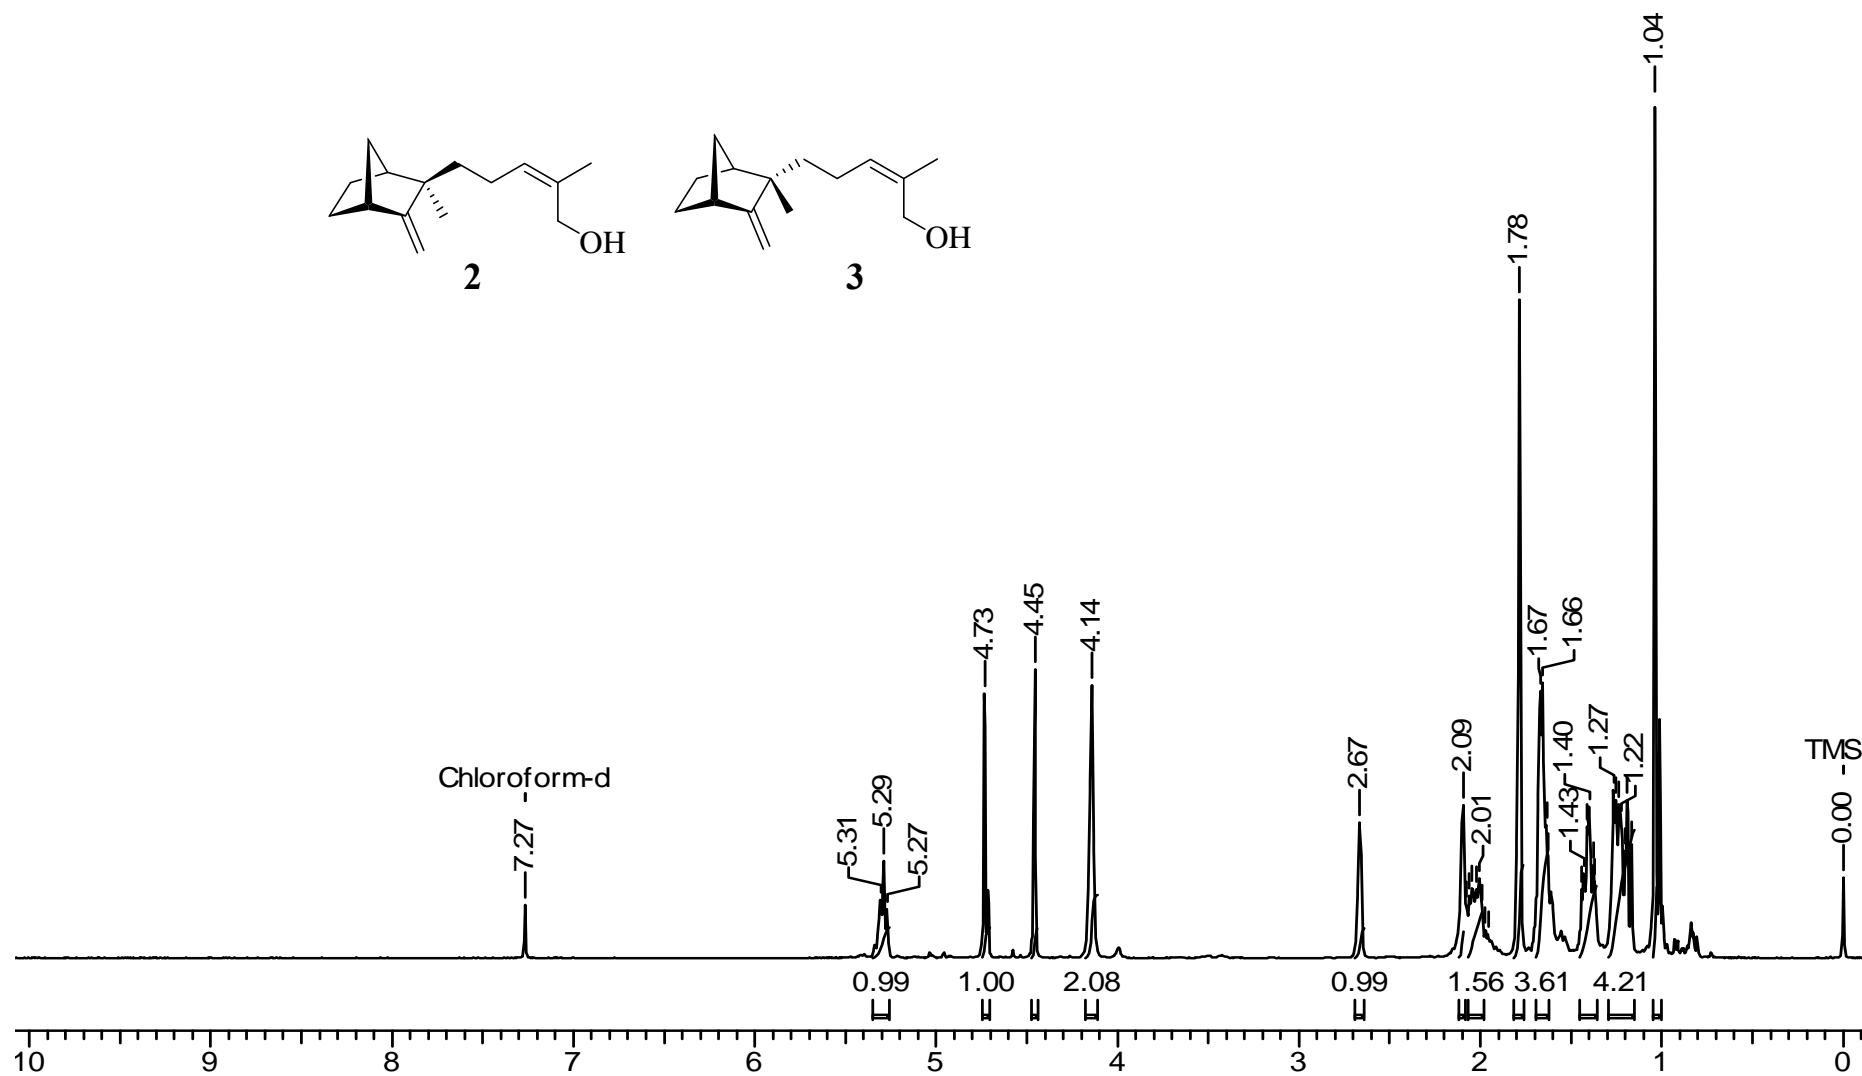

Fig S4: <sup>1</sup>H NMR spectrum of 2 & 3 in CDCl<sub>3</sub> at 500 MHz.

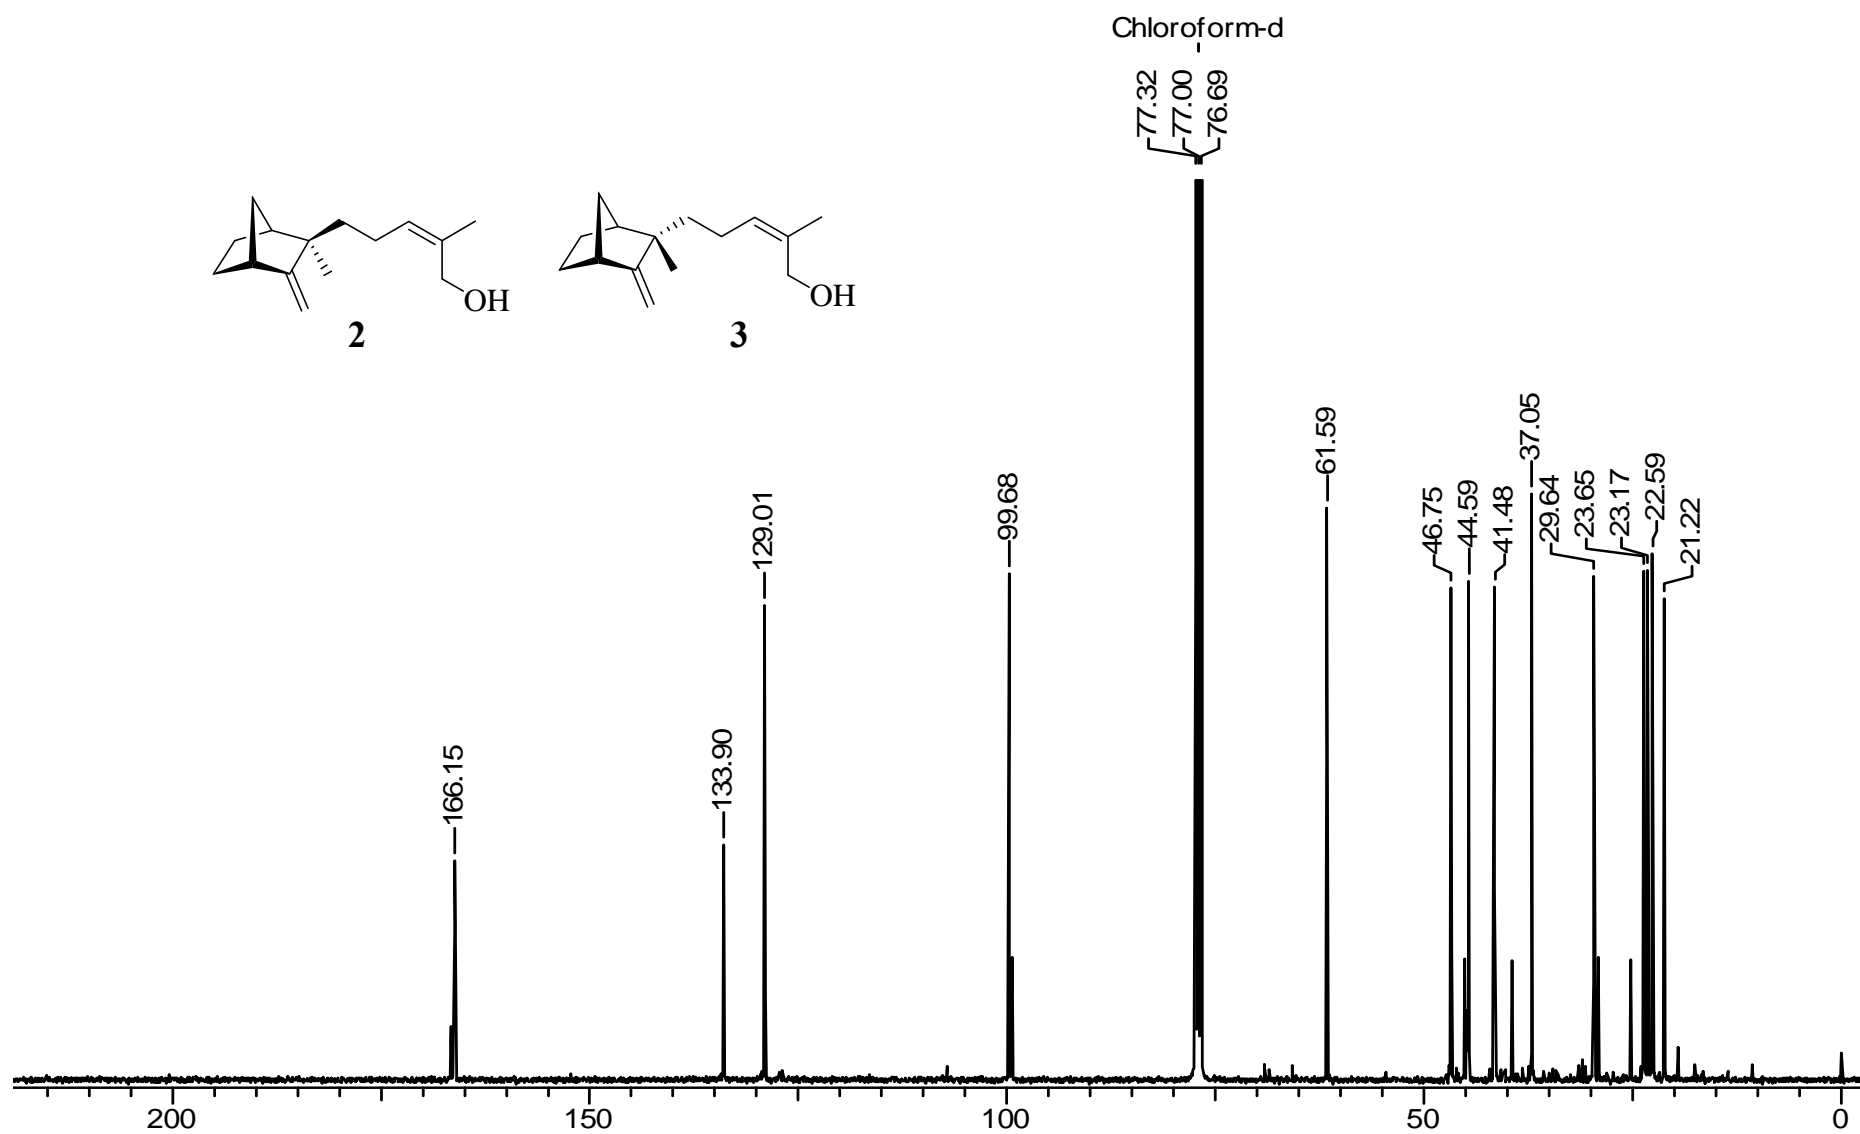

Fig S5:  $^{13}\text{C}$  NMR spectrum of **2** & **3** in  $\text{CDCl}_3$  at 125 MHz.



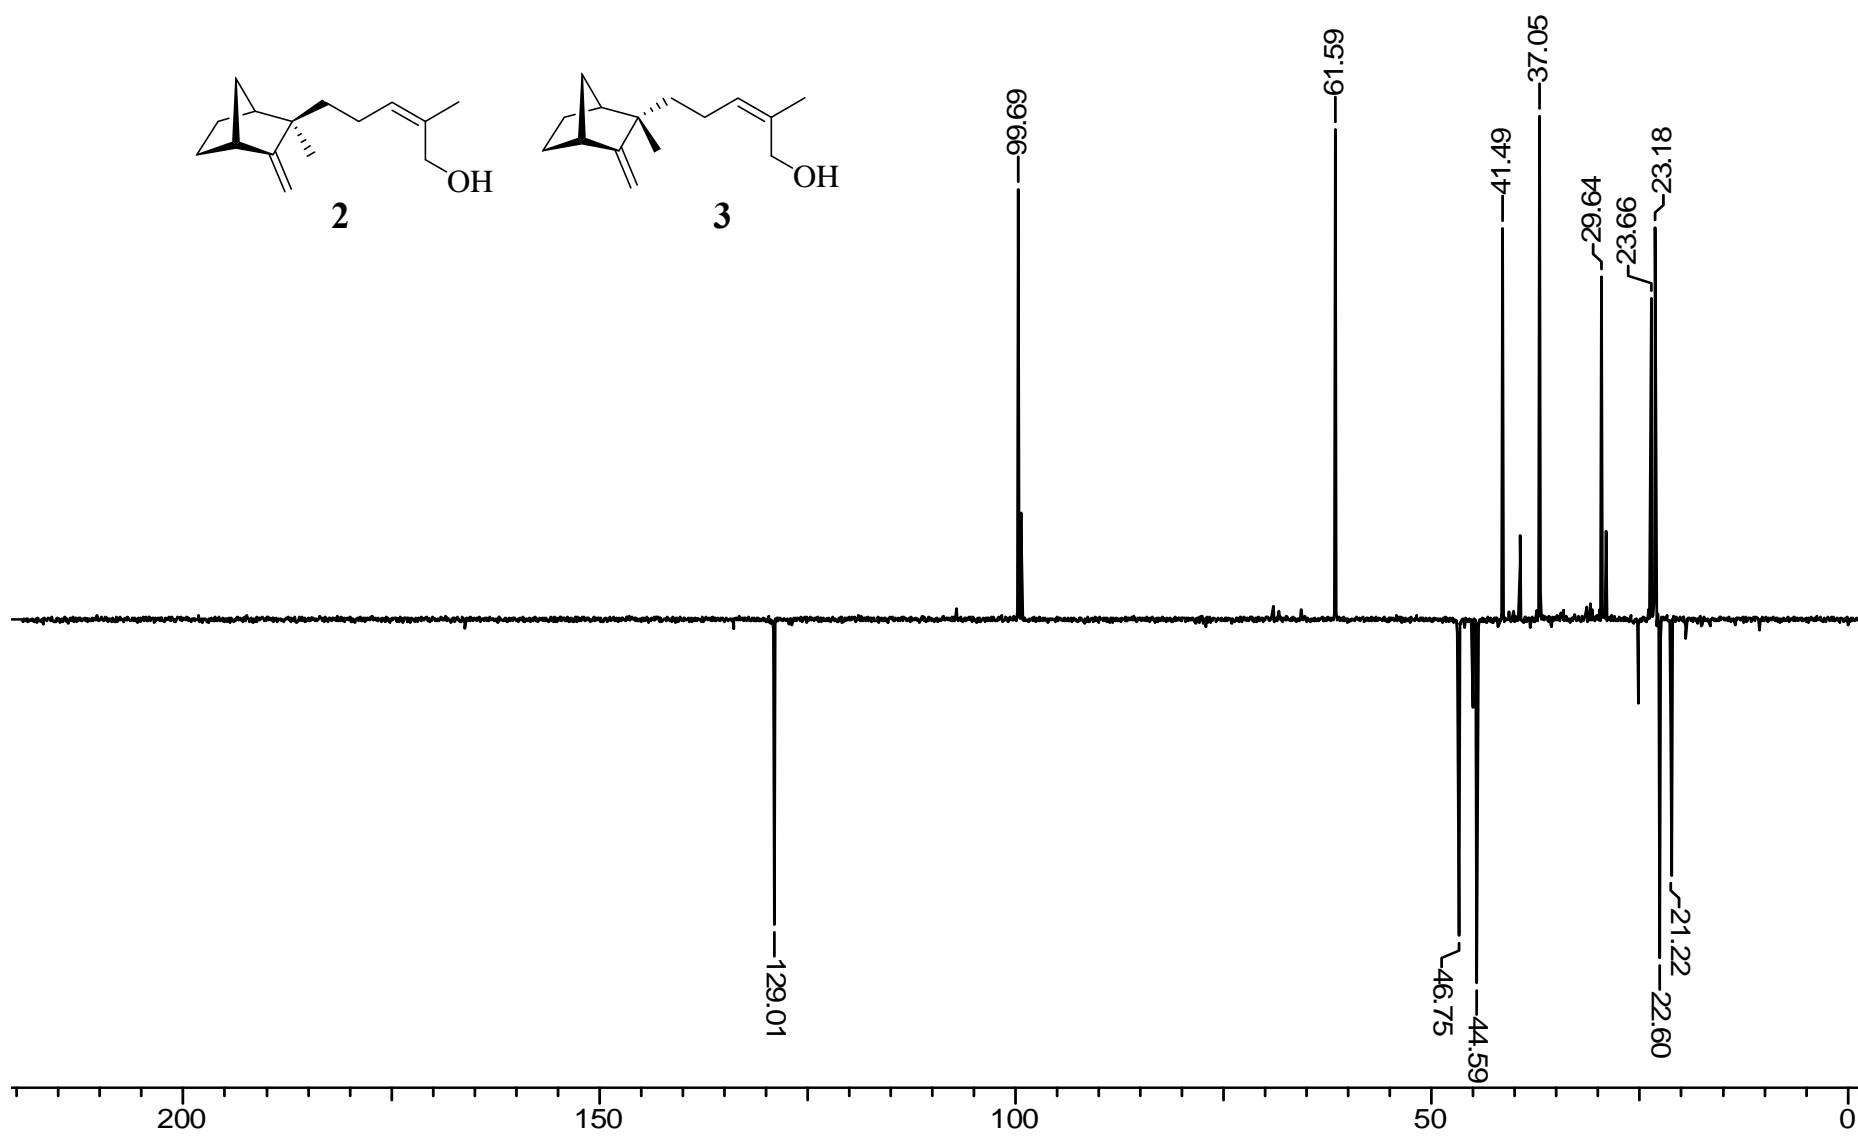

**Fig S6:** DEPT NMR spectrum of **2** & **3** in CDCl<sub>3</sub> at 125 MHz.

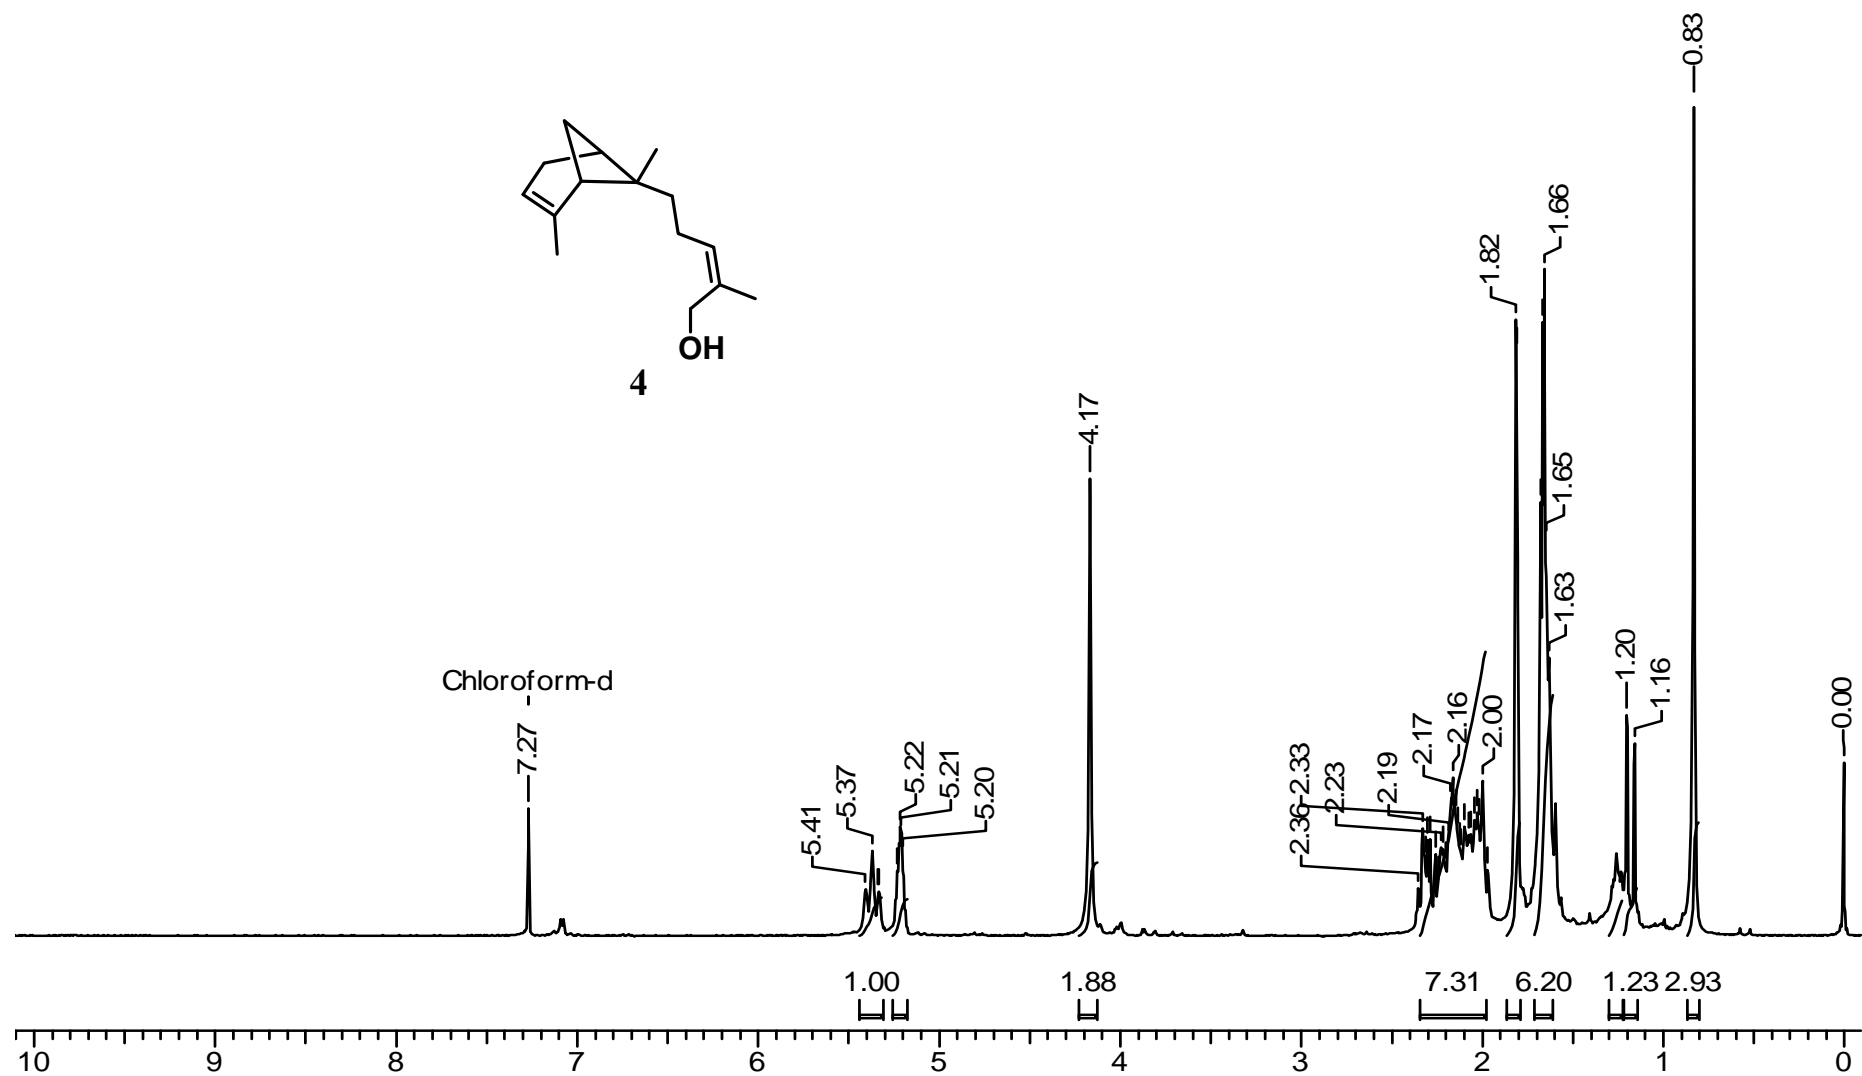

Fig S7:  $^1\text{H}$  NMR spectrum of **4** in  $\text{CDCl}_3$  at 200 MHz.

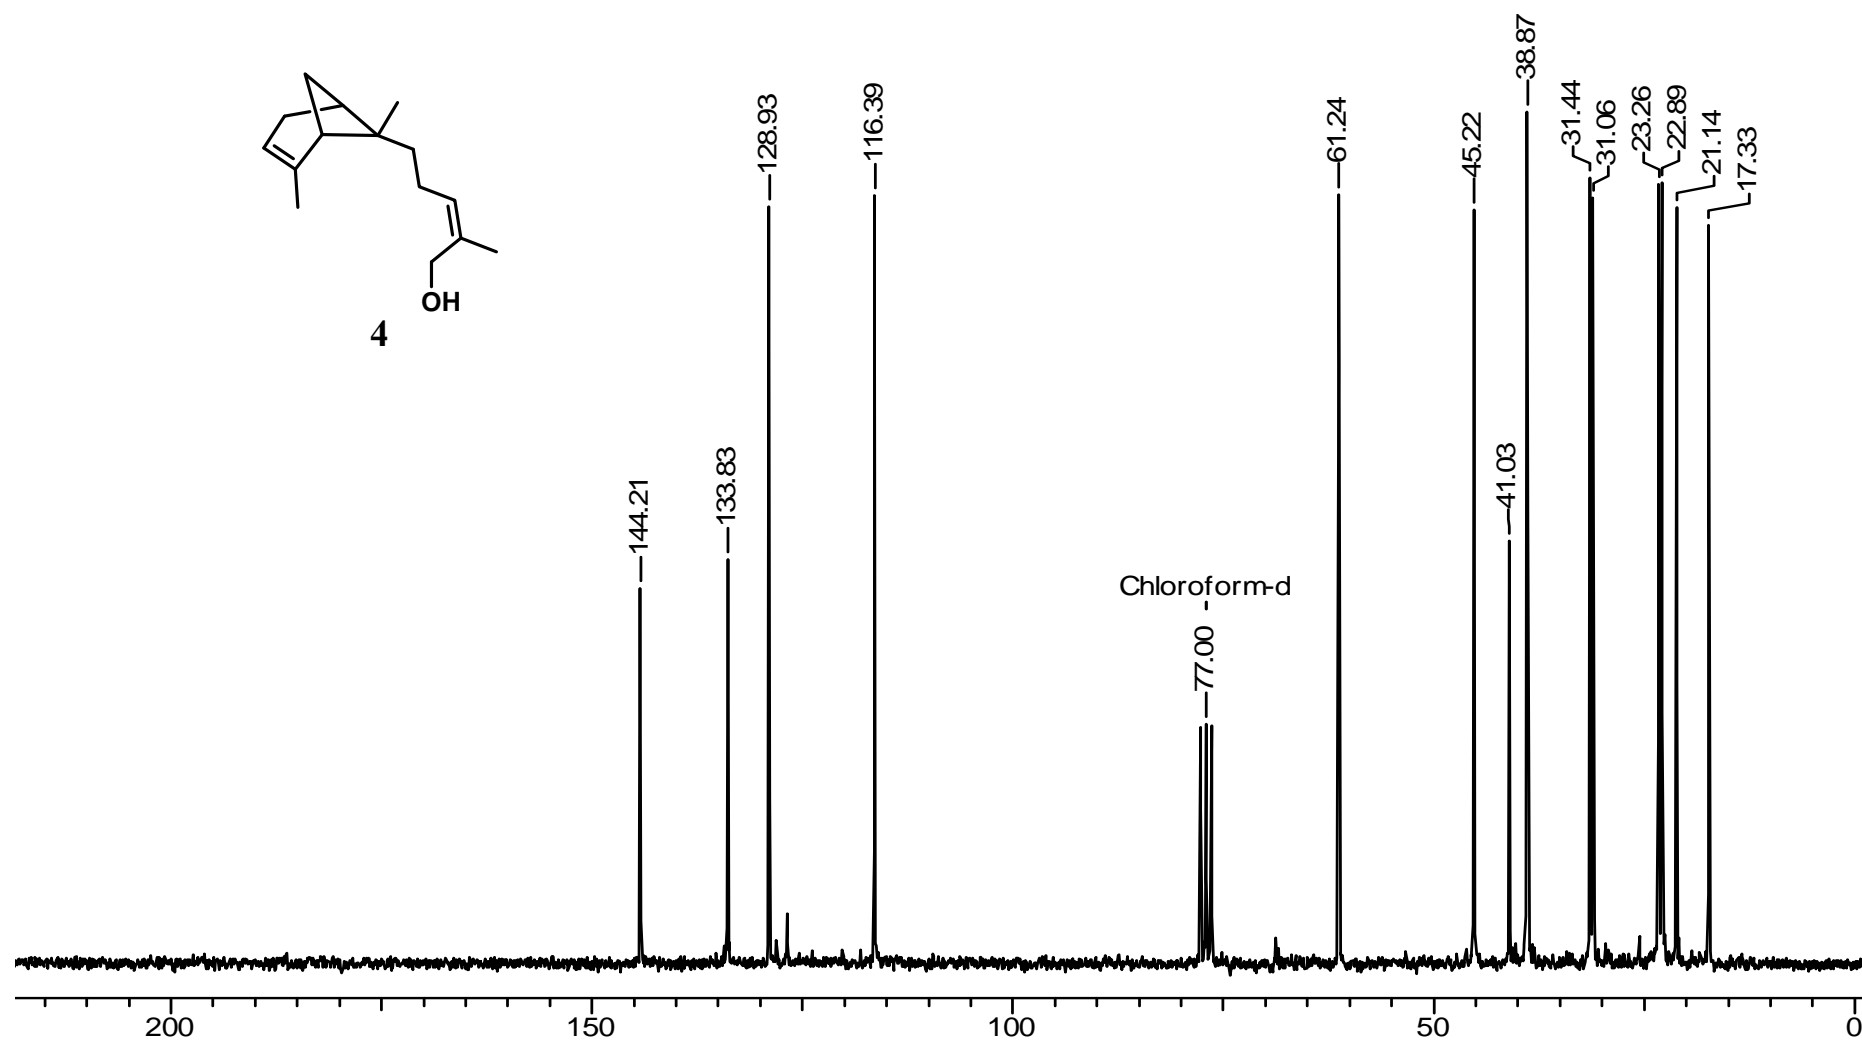

Fig S8: <sup>13</sup>C NMR spectrum of **4** in CDCl<sub>3</sub> at 50 MHz.

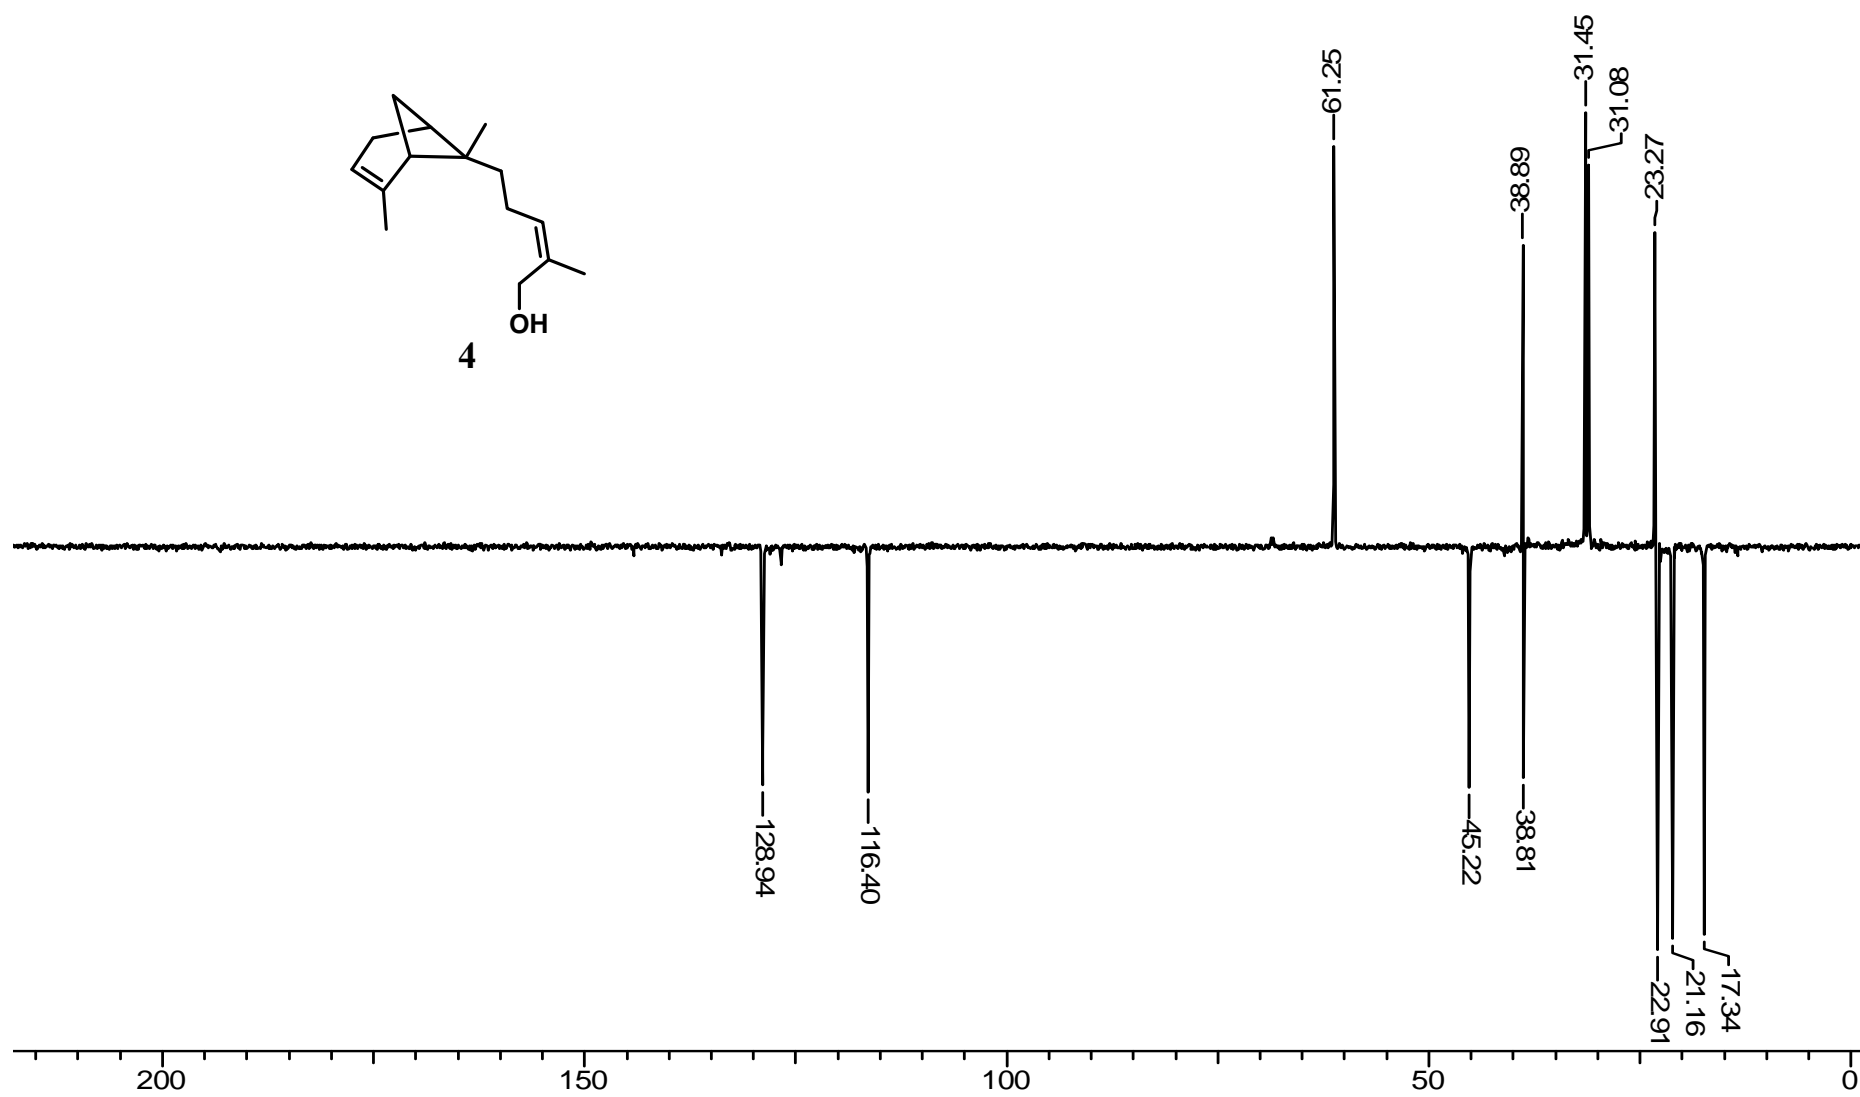

**Fig S9:** DEPT NMR spectrum of **4** in CDCl<sub>3</sub> at 50 MHz.

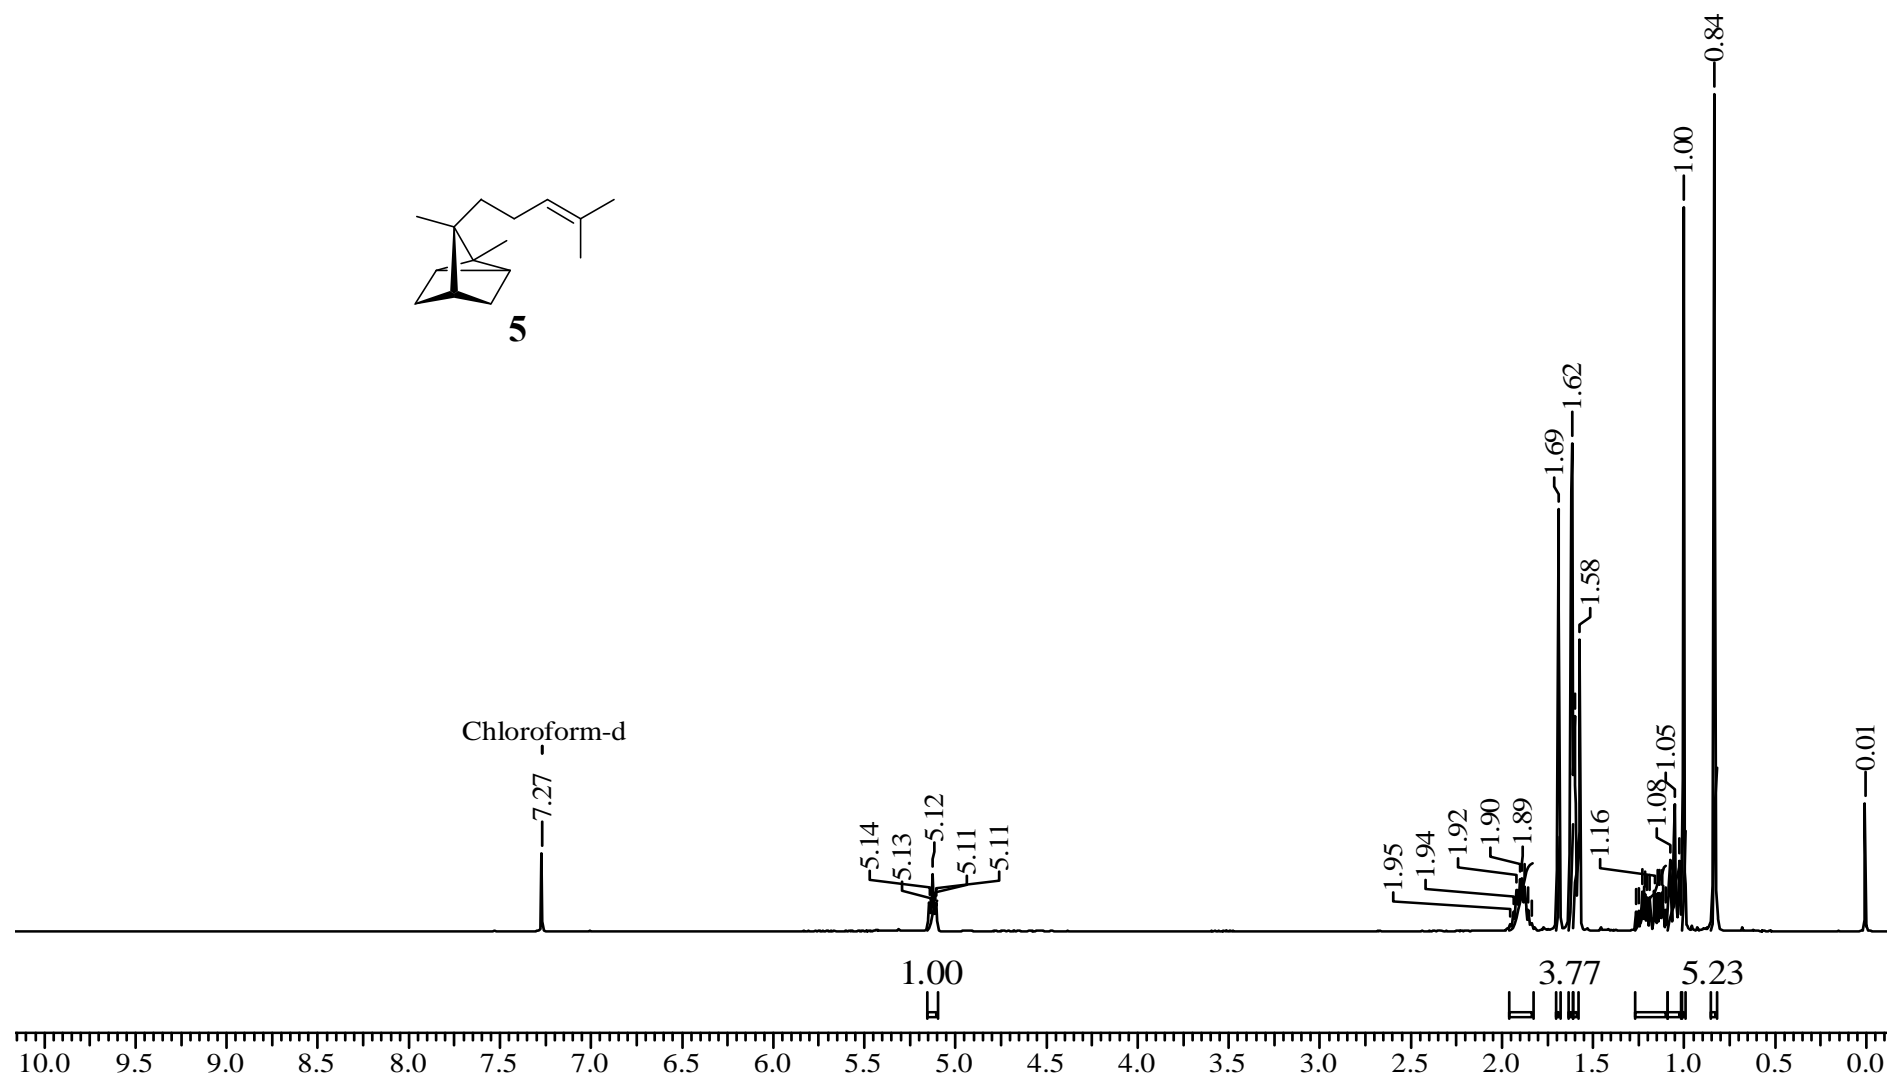

**Fig S10:** <sup>1</sup>H NMR spectrum of **5** in CDCl<sub>3</sub> at 500 MHz.

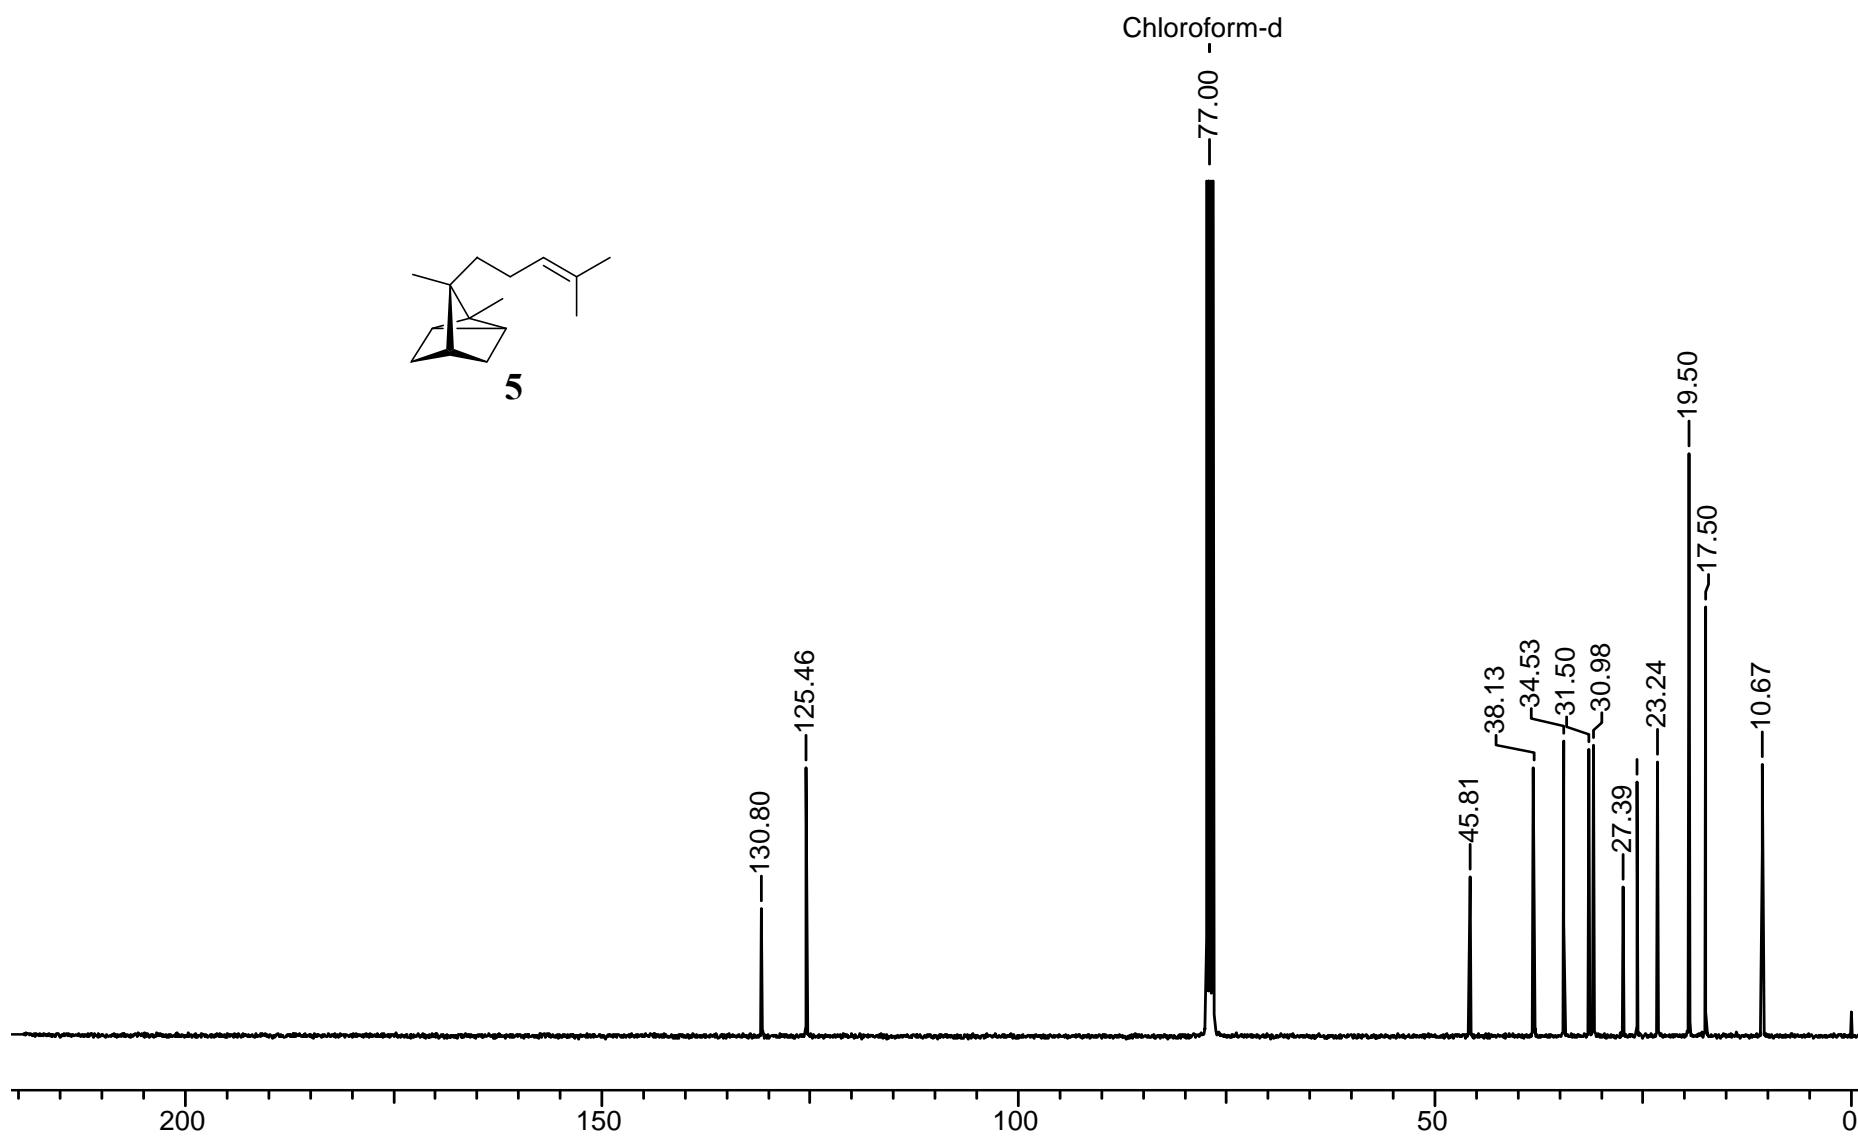

Fig S11:  $^{13}\text{C}$  NMR spectrum of **5** in  $\text{CDCl}_3$  at 125 MHz.

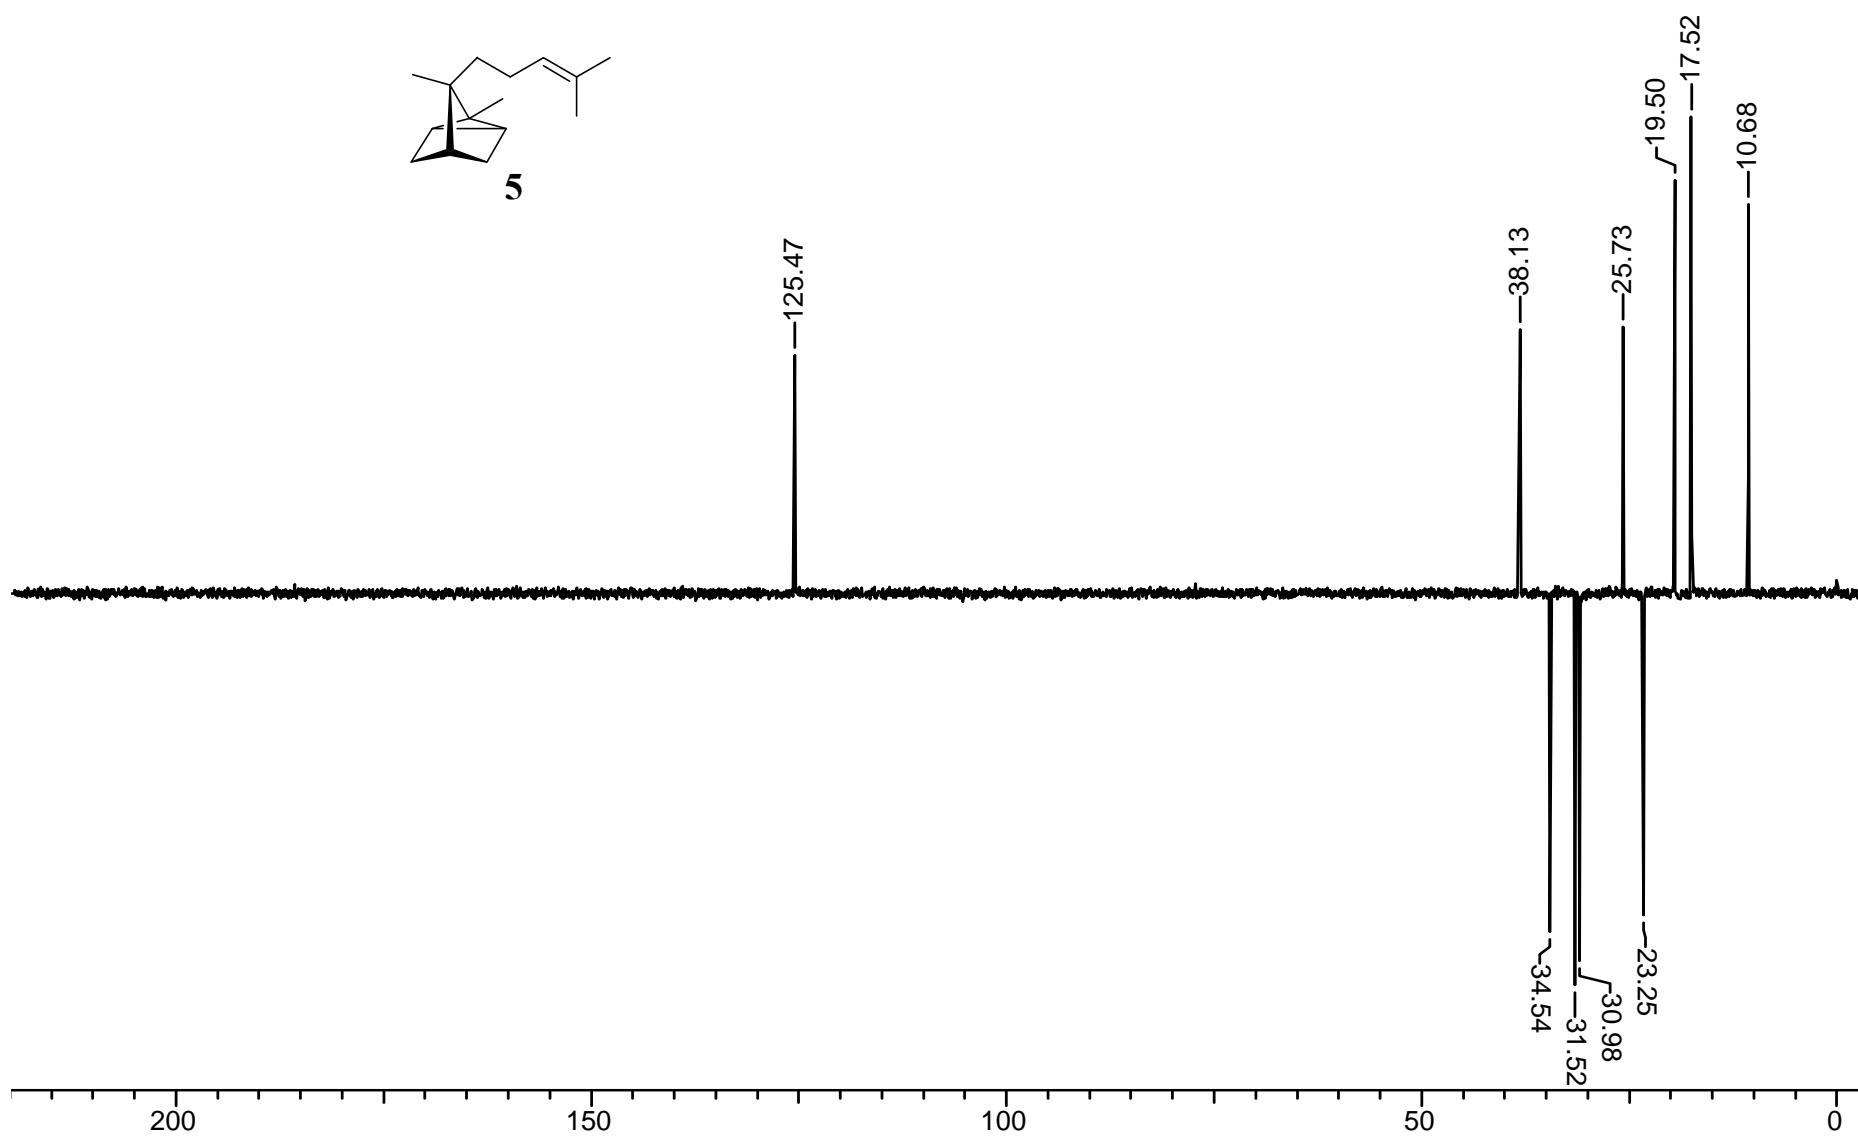

**Fig S12:** DEPT NMR spectrum of **5** in CDCl<sub>3</sub> at 125 MHz.

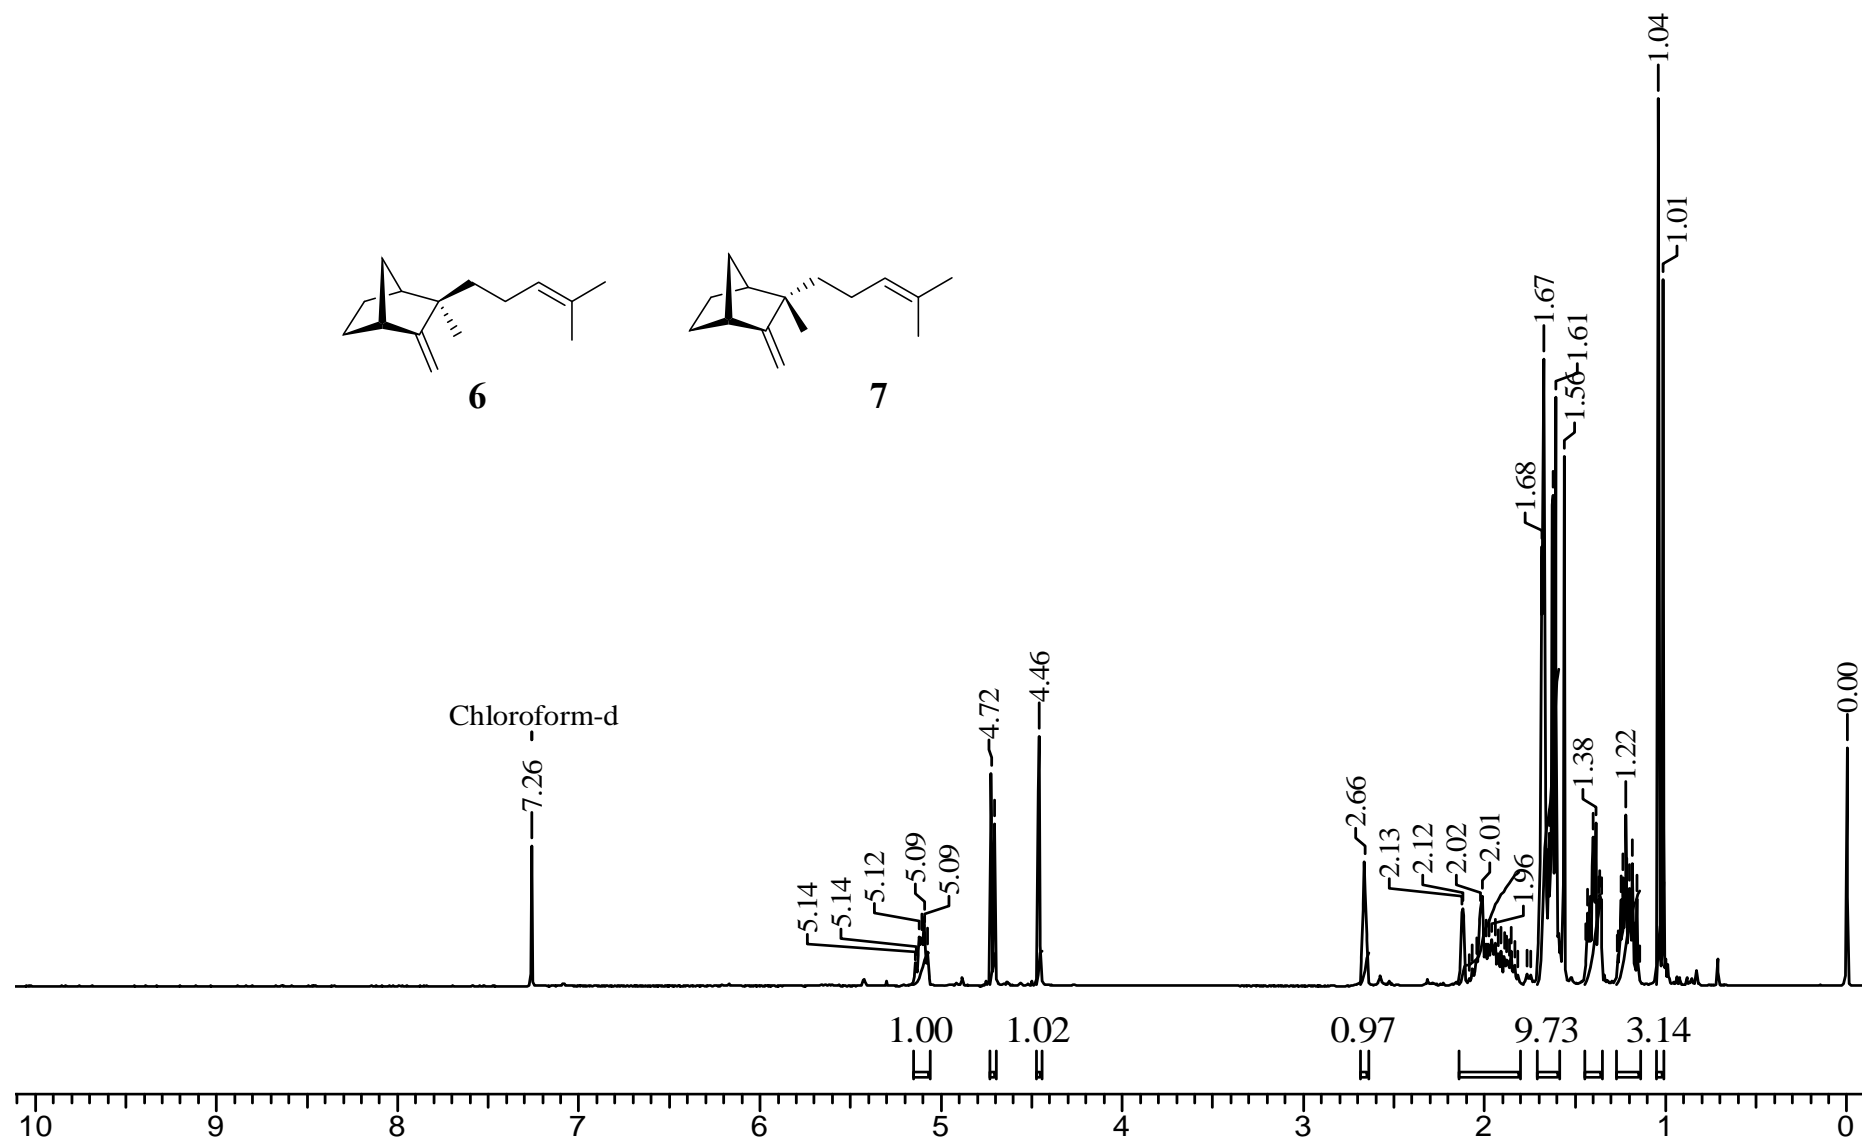

Fig S13: <sup>1</sup>H NMR spectrum of 6 & 7 in CDCl<sub>3</sub> at 500 MHz.



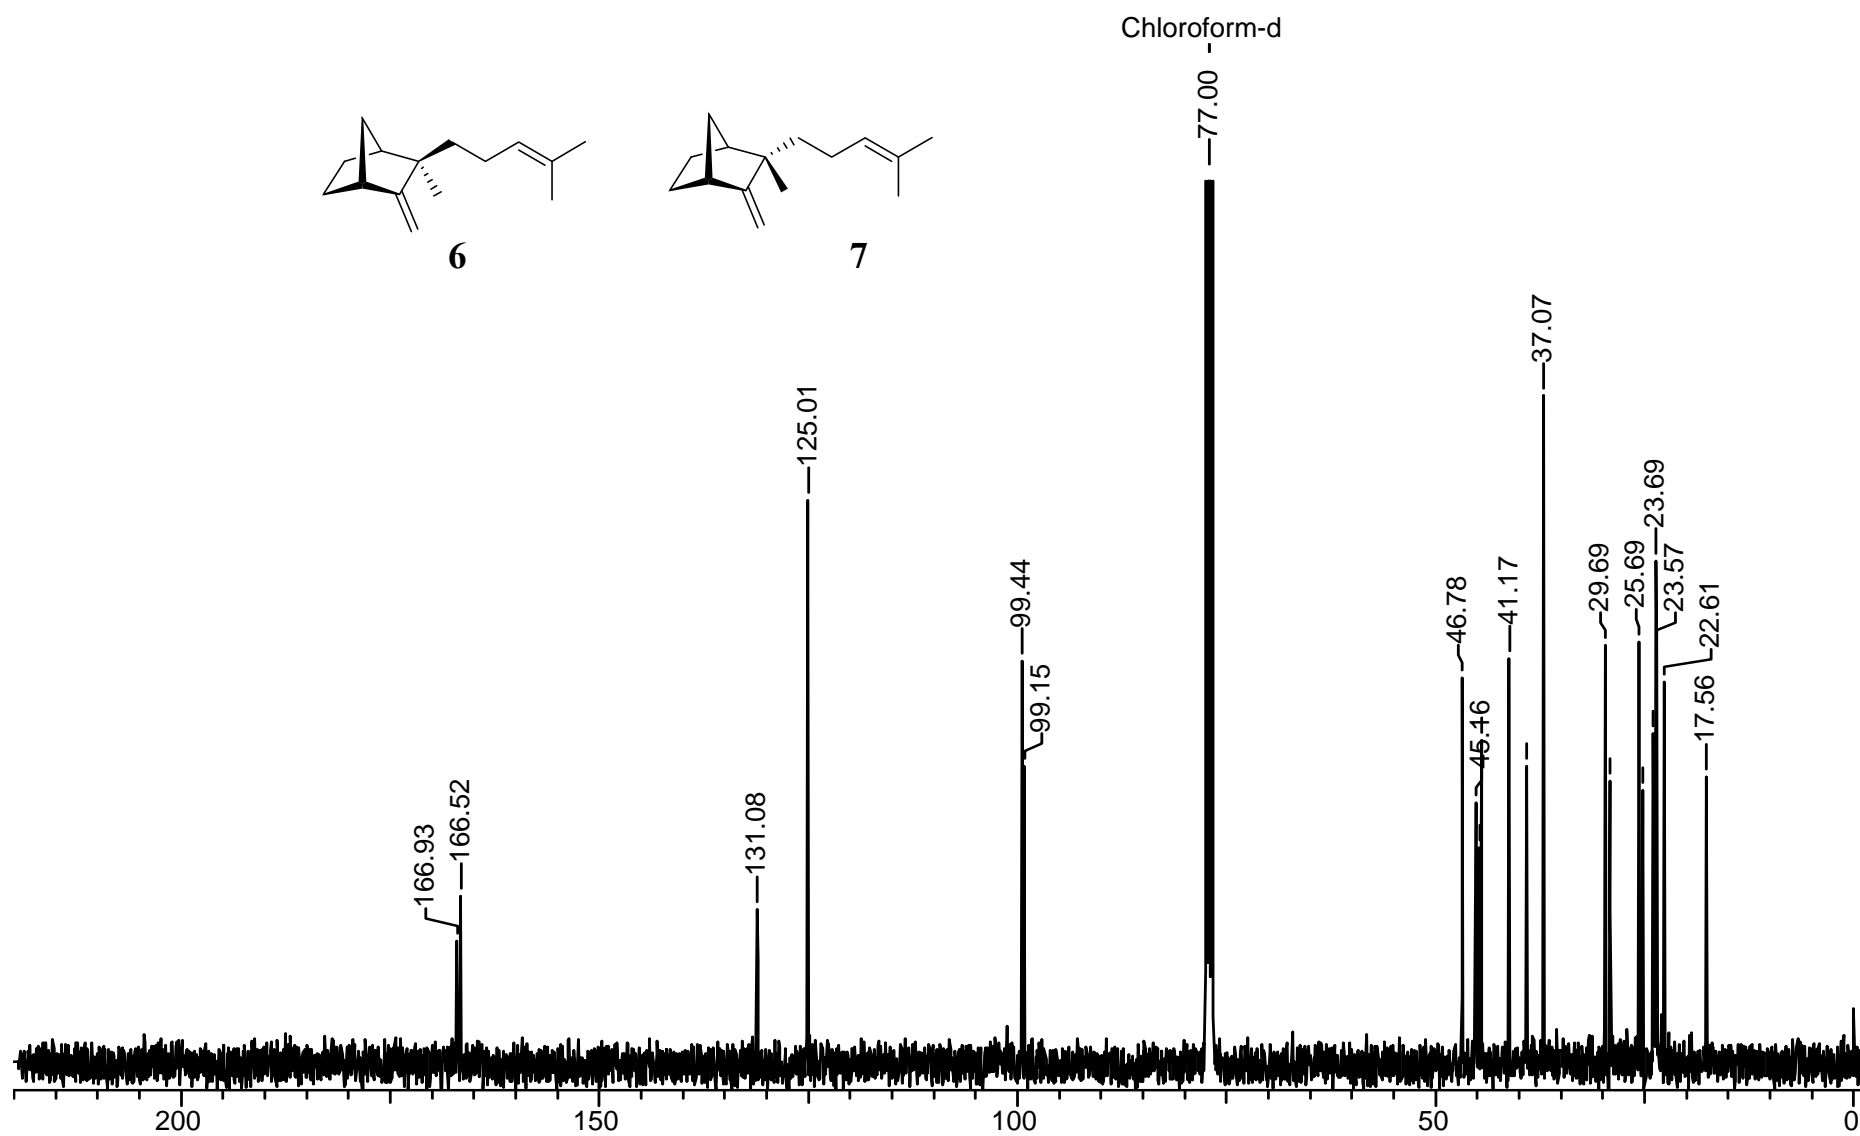

Fig S14:  $^{13}\text{C}$  NMR spectrum of 6 & 7 in  $\text{CDCl}_3$  at 125 MHz.

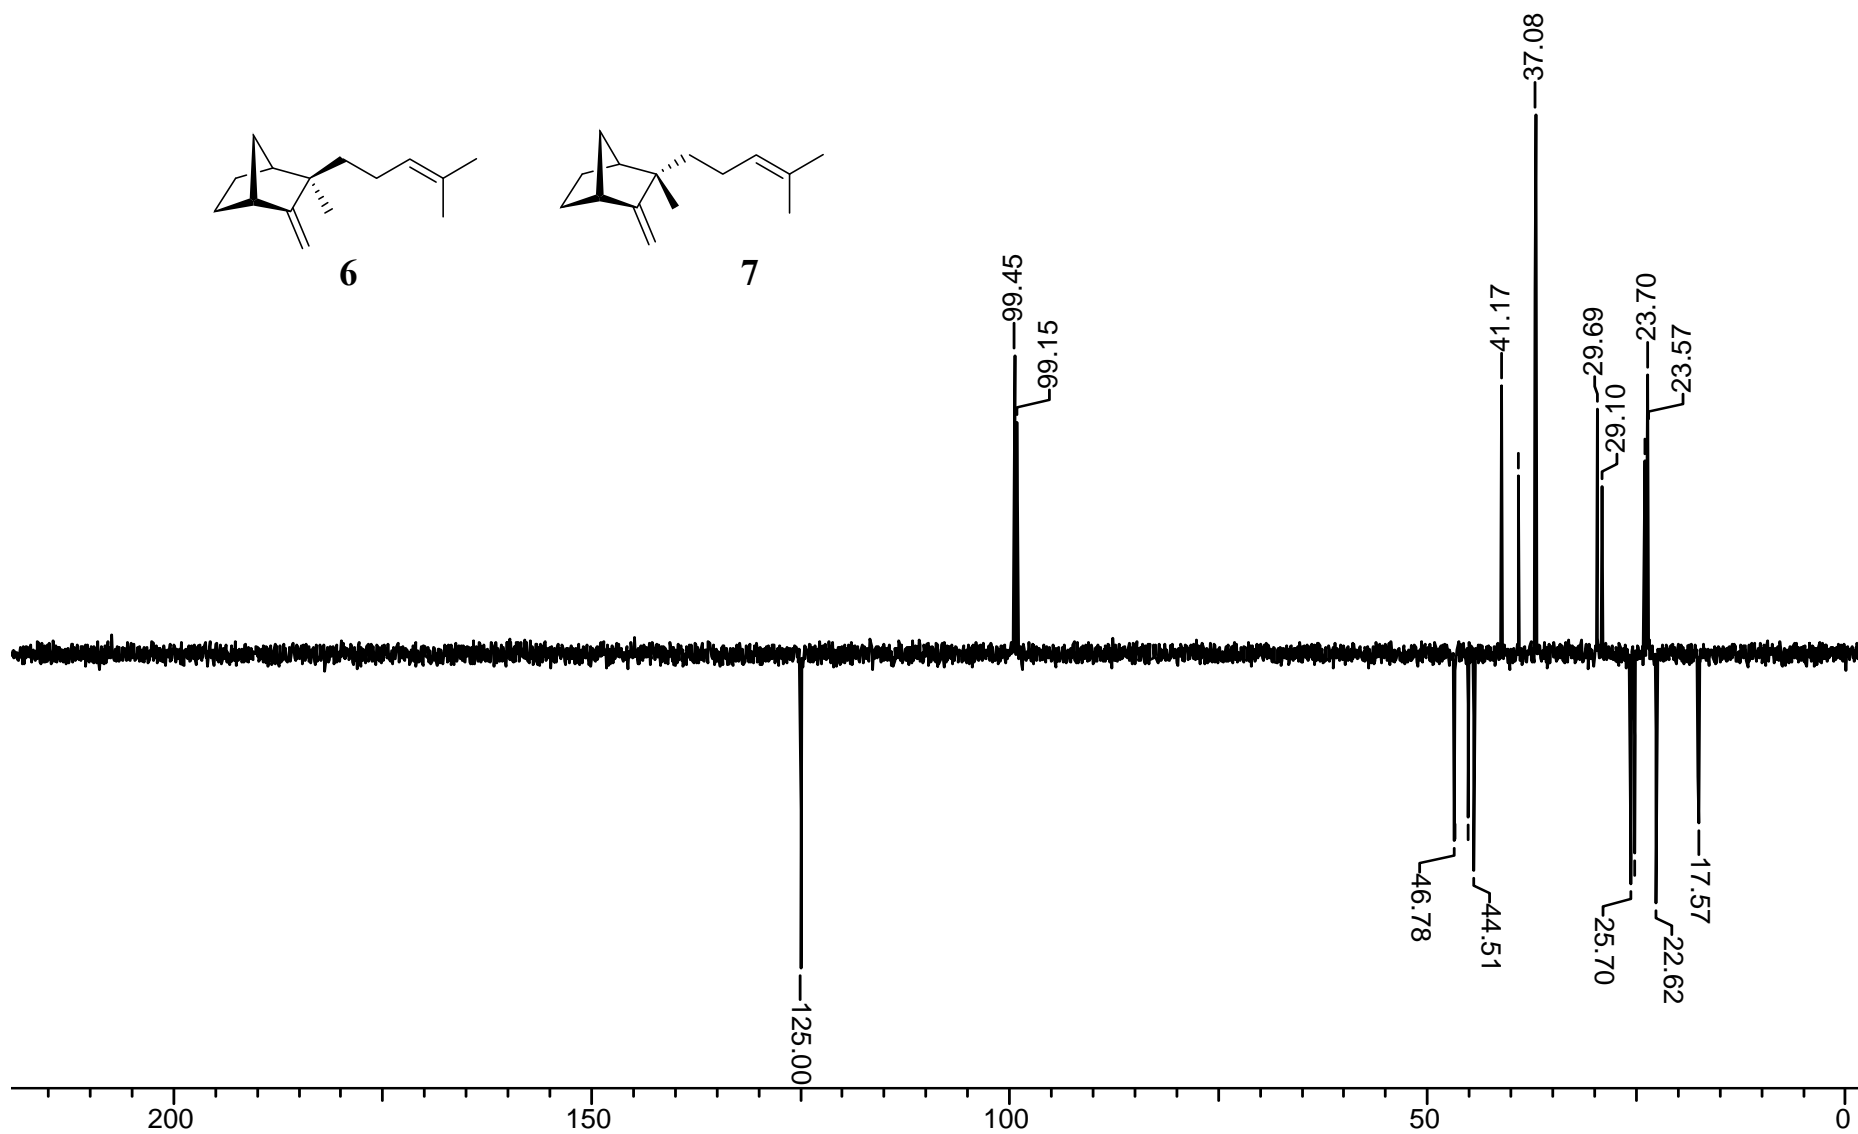

Fig S15: DEPT NMR spectrum of **6** & **7** in CDCl<sub>3</sub> at 125 MHz.

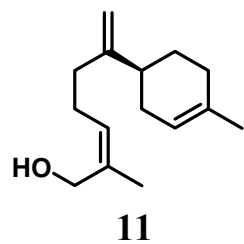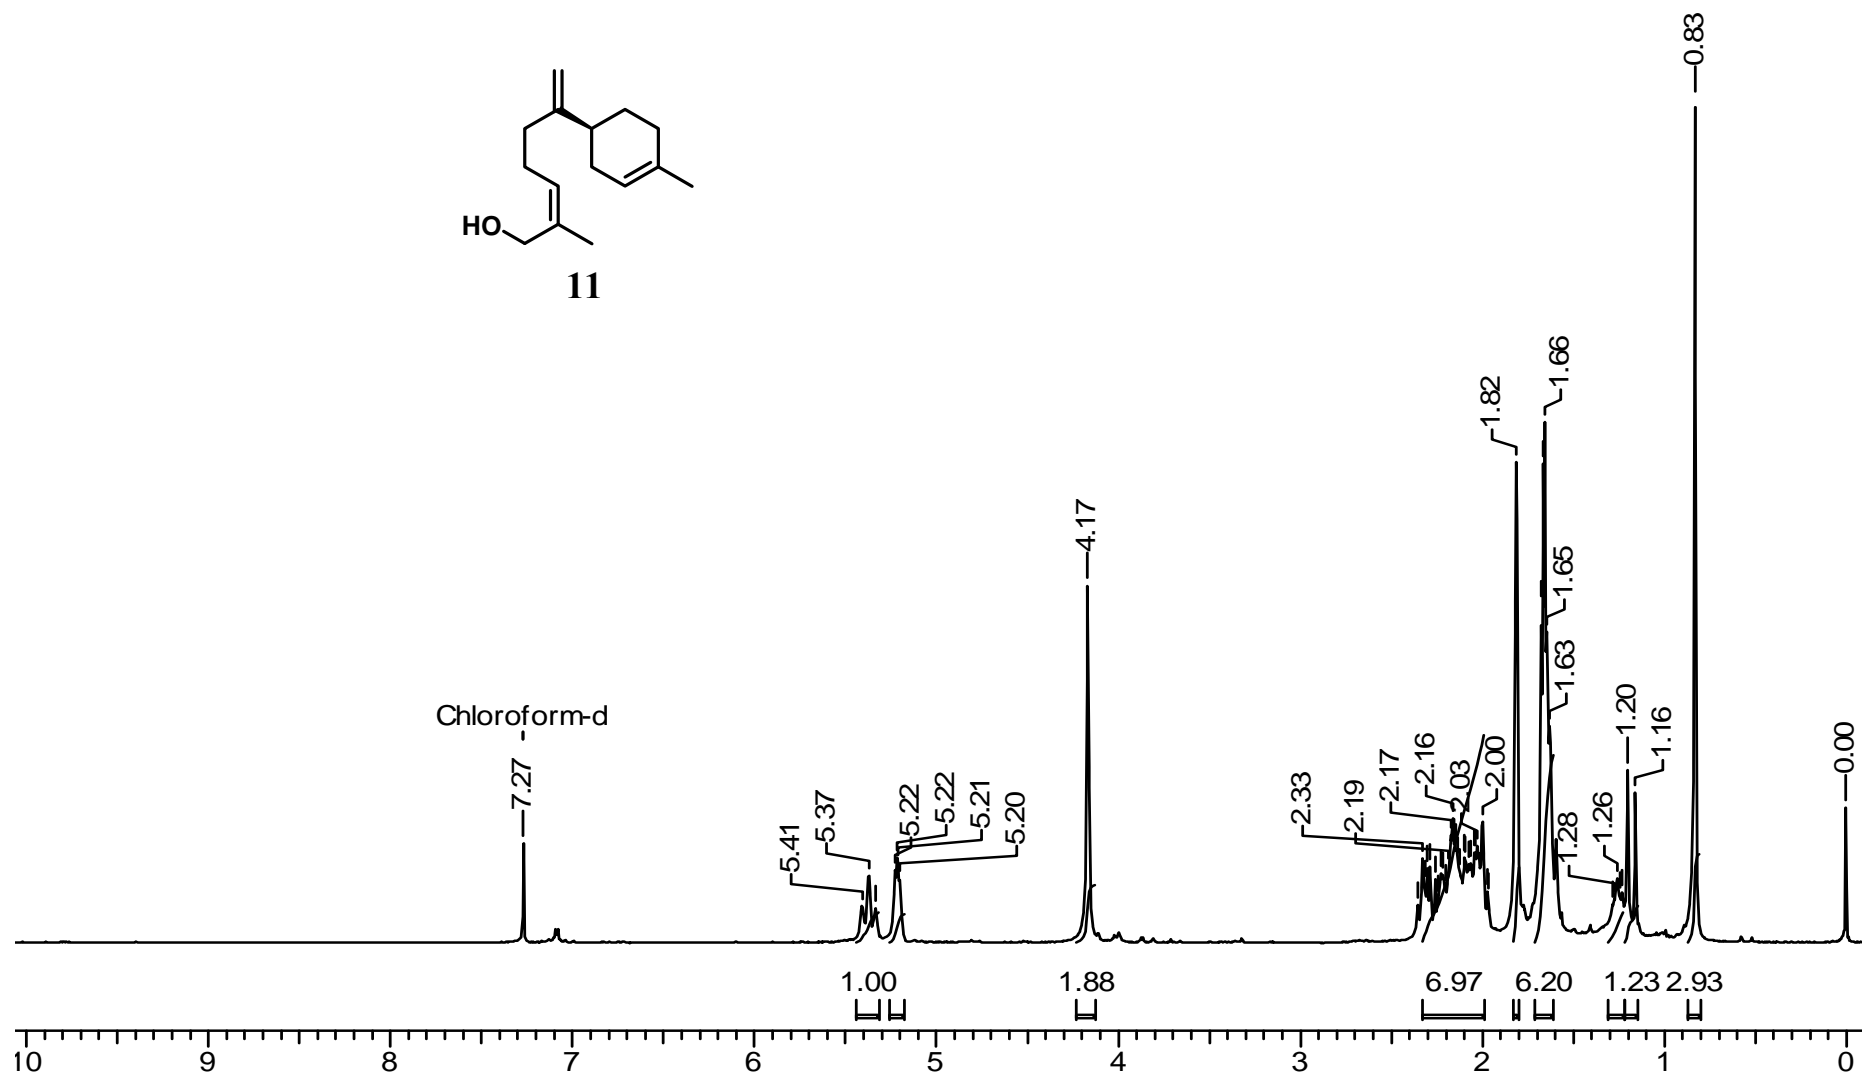

**Fig S16:** <sup>1</sup>H NMR spectrum of **11** in CDCl<sub>3</sub> at 200 MHz.

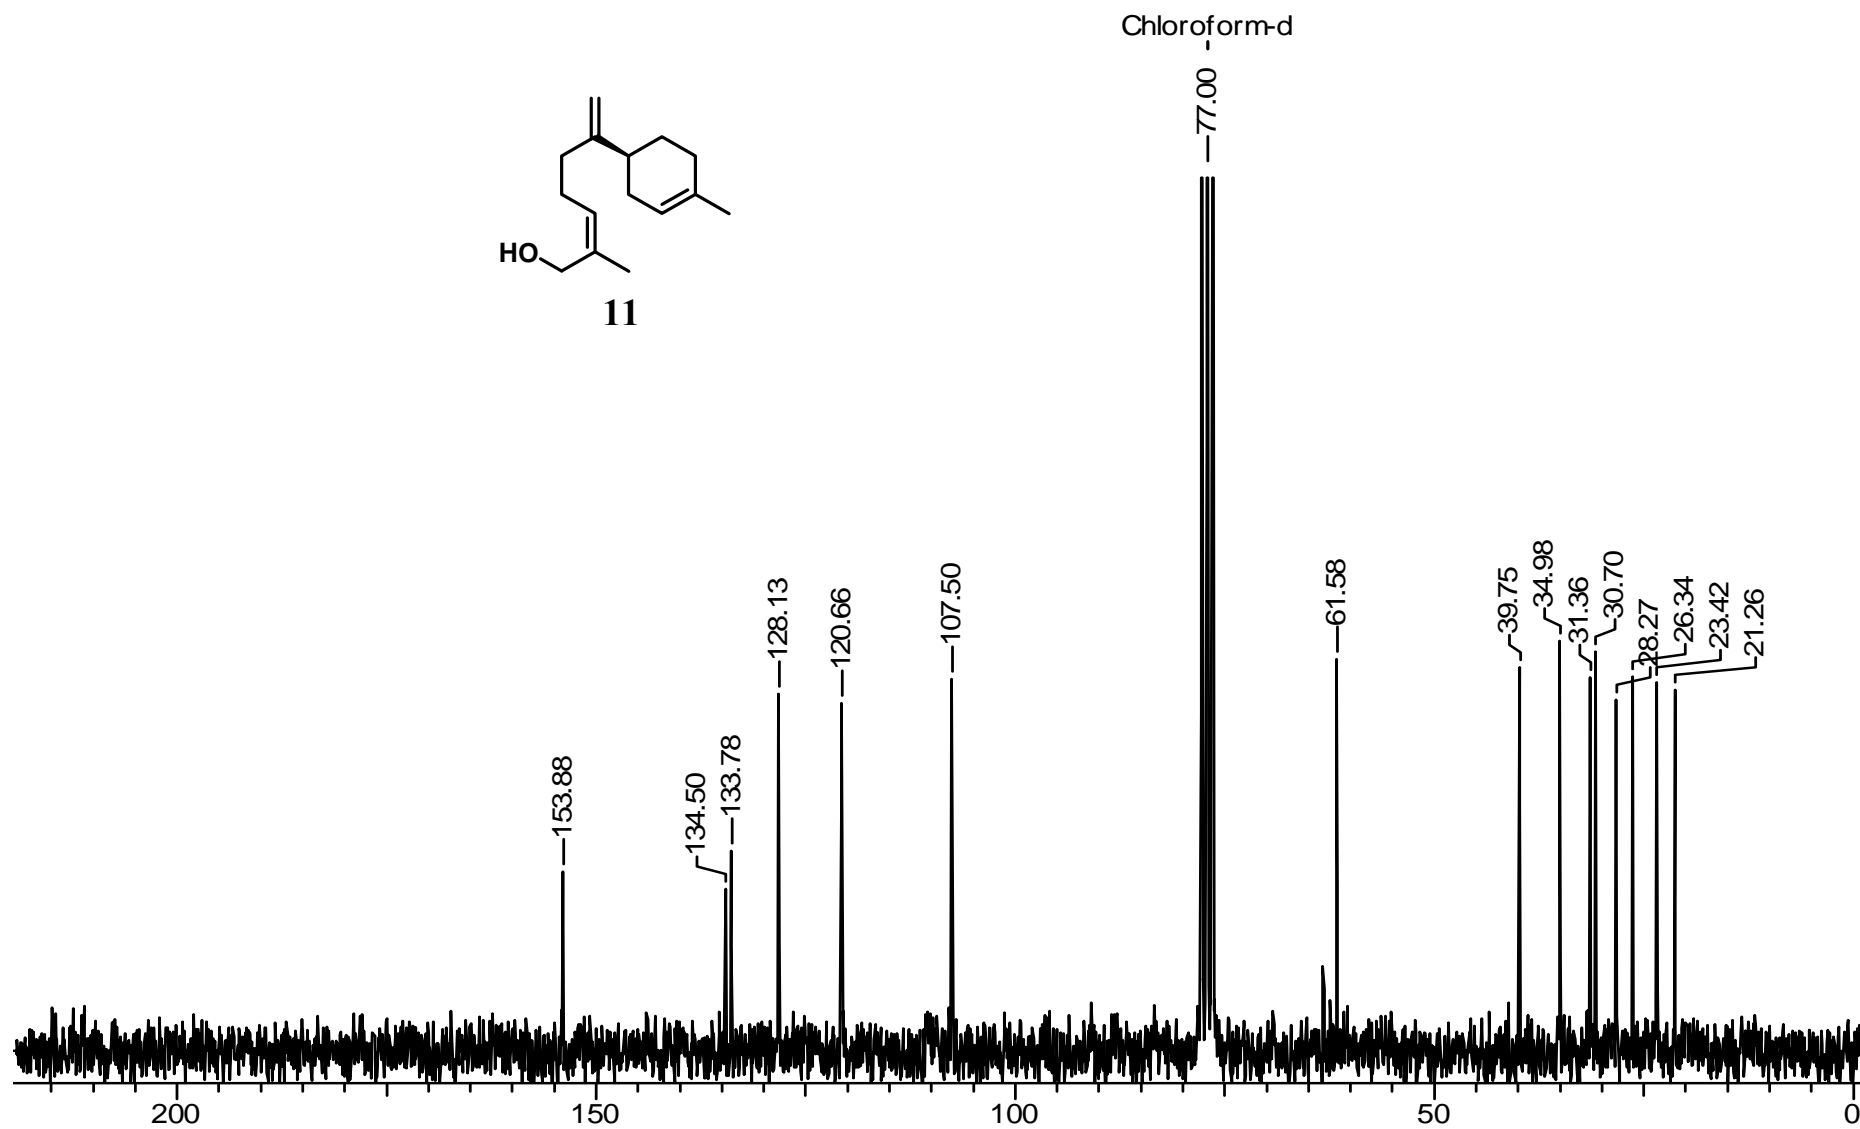

**Fig S17:**  $^{13}\text{C}$  NMR spectrum of **11** in  $\text{CDCl}_3$  at 50 MHz.

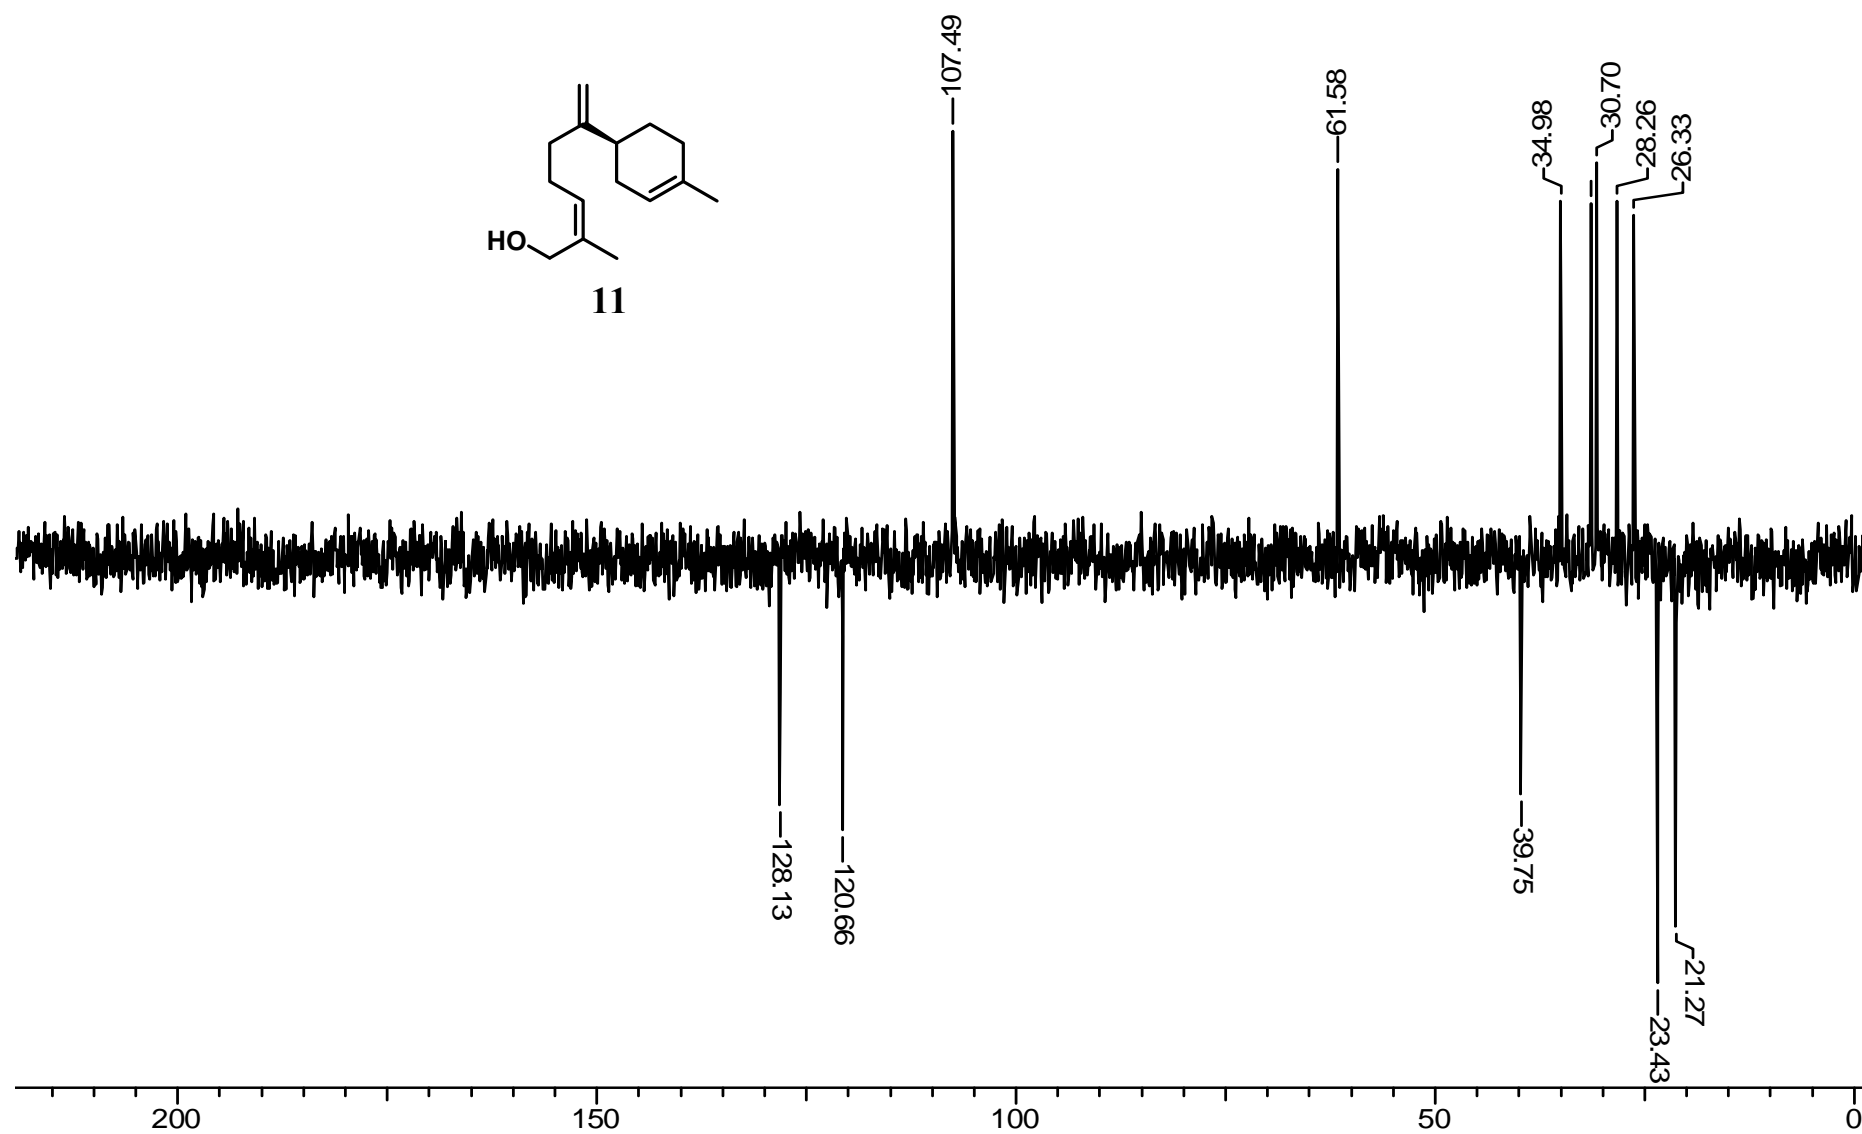

**Fig S18:** DEPT NMR spectrum of **11** in CDCl<sub>3</sub> at 50 MHz.

Fig S19: Graphs from quantification studies of components of sandalwood oil:

A) (Z)- $\alpha$ -Santalol (1):

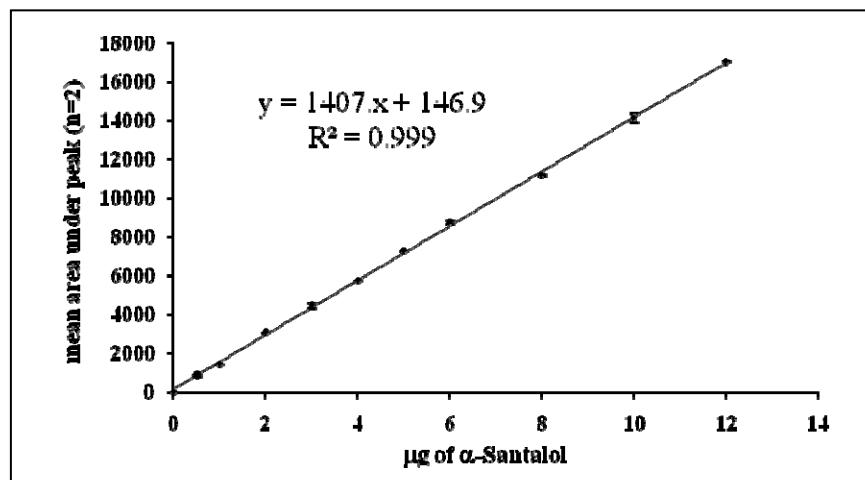

B) (Z)-( $\beta$  + *epi*- $\beta$ )-Santalol (2 & 3):

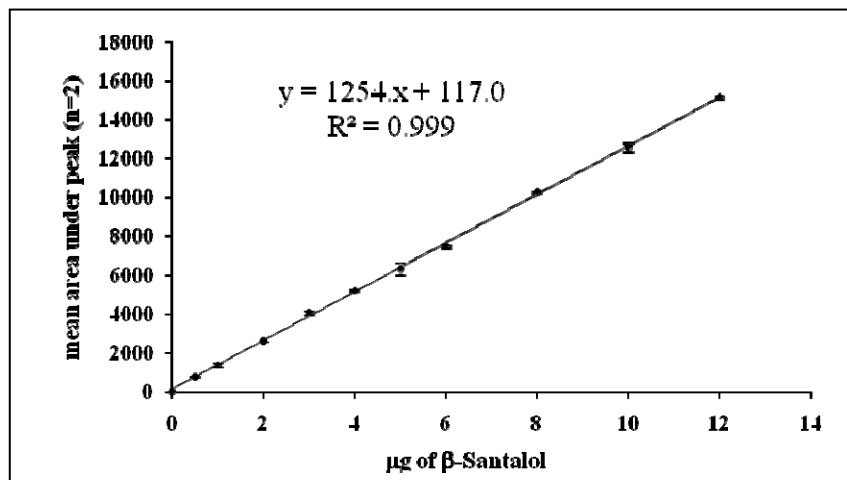

C) (Z)- $\alpha$ -trans-Bergamotol (4):

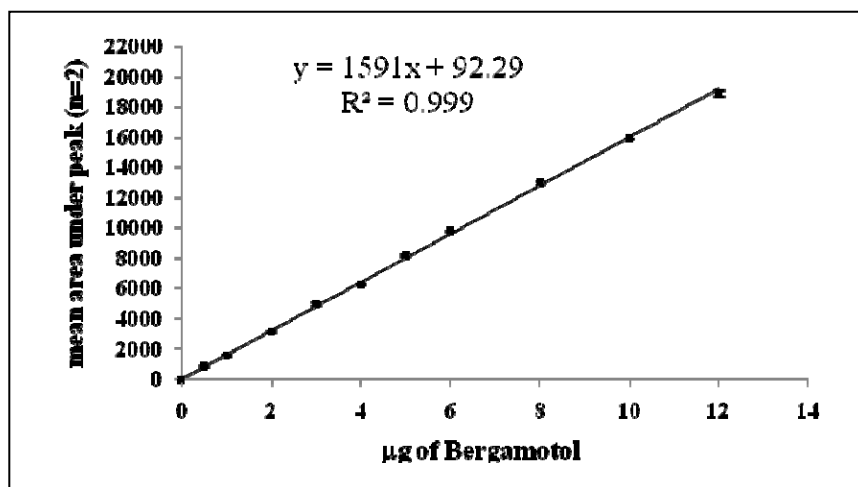

D)  $\alpha$ -Santalene (5):

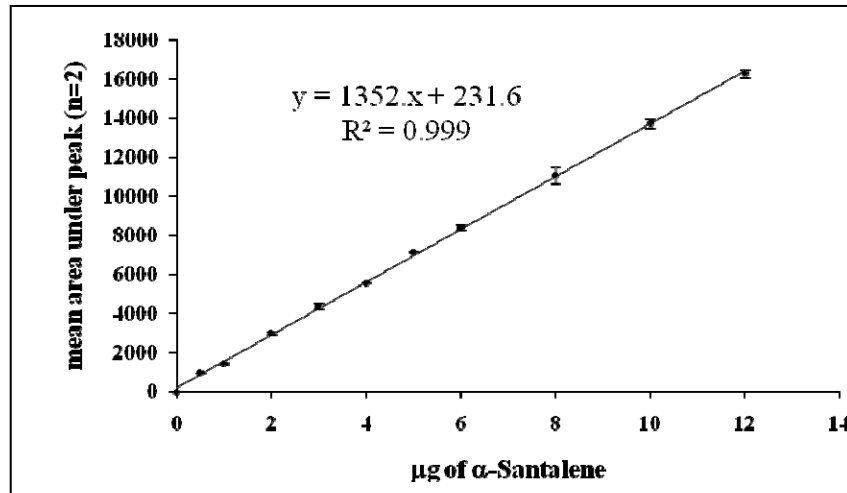

E) ( $\beta$ -*+* *epi*- $\beta$ )-Santalene (6 & 7):

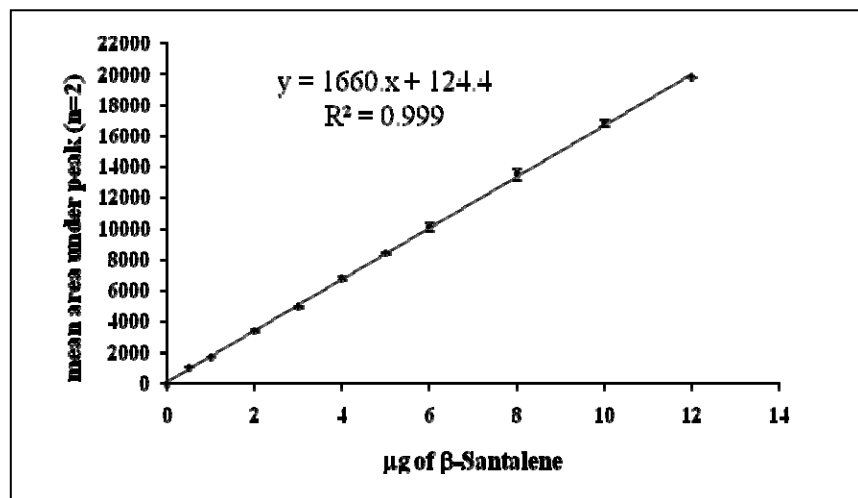

F) (-)- $\alpha$ -Bisabolol (8):

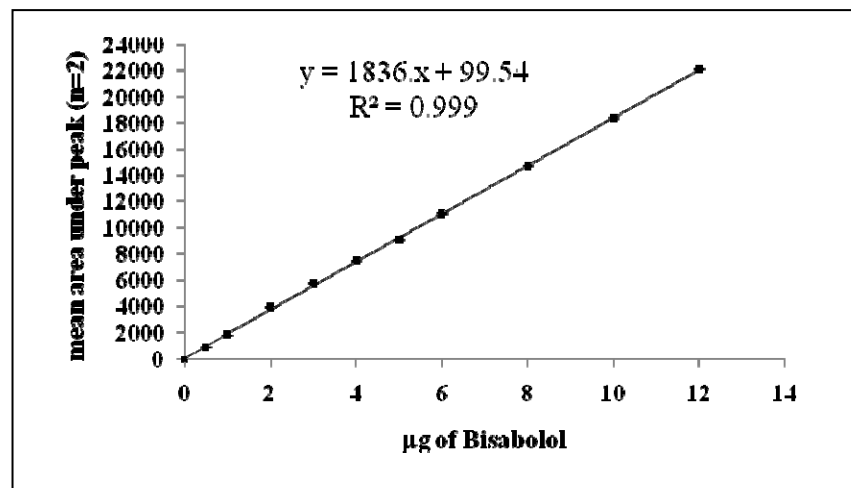

G) (*E*), (*E*)-Farnesol (9):

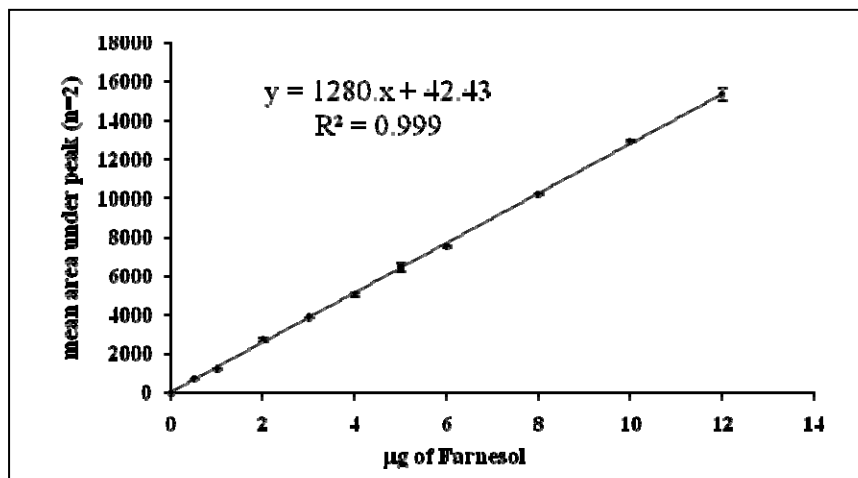

H) (*Z*)-Lanceol (11):

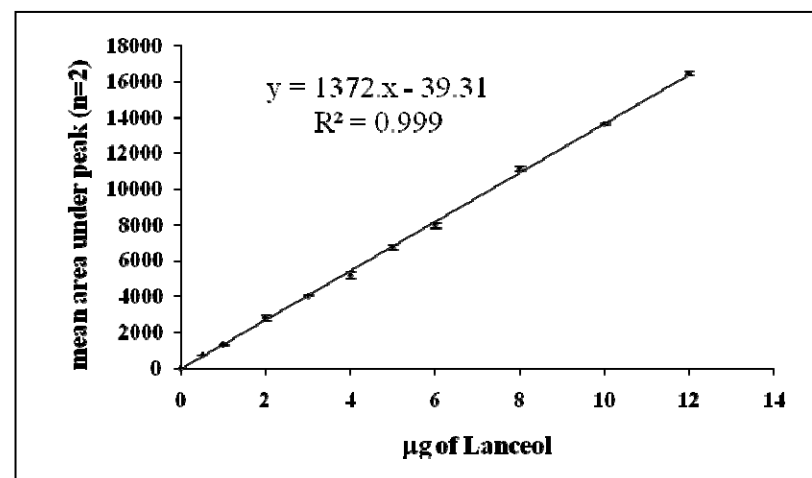

**Fig. S20: Co-injection of purified components with Sandalwood oil:**

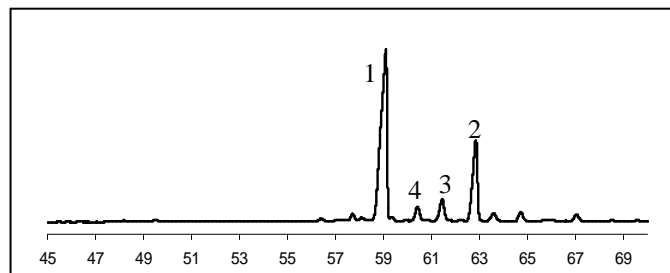

A) Sandalwood oil

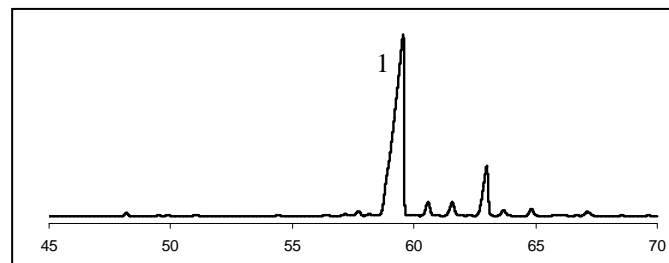

B) Co-injection of (Z)-α-Santalol (**1**) with Sandalwood oil

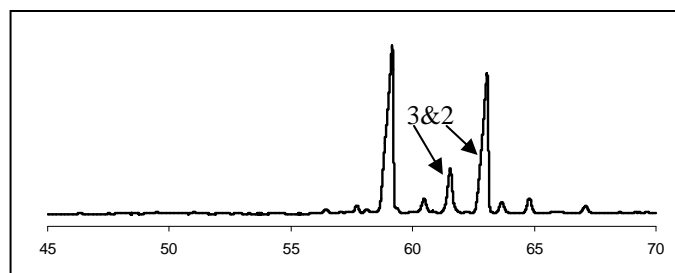

C) Co-injection of (Z)-(β+ *epi*-β)-Santalol (**2&3**) with Sandalwood oil

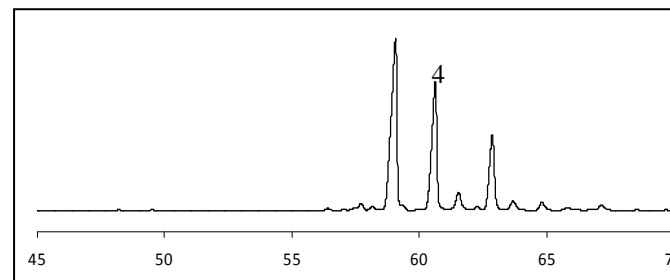

D) Co-injection of (Z)-α-trans-Bergamotol (**4**) with Sandalwood oil

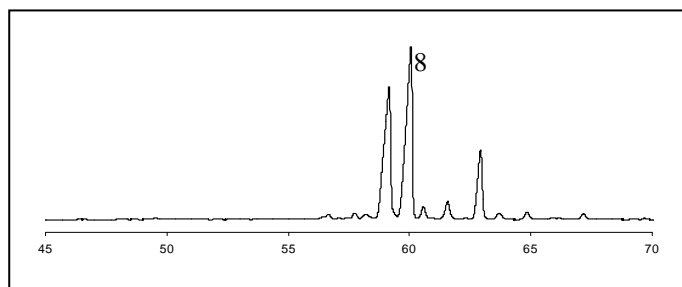

E) Co-injection of (-)-α-Bisabolol (**8**) with Sandalwood oil

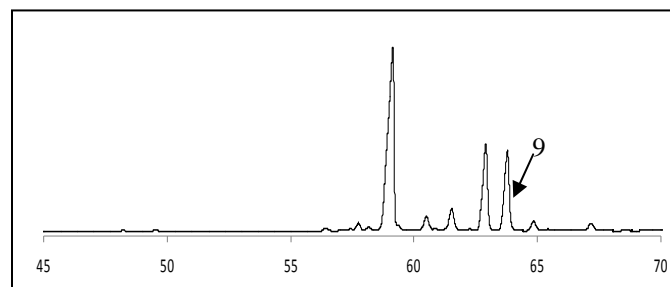

F) Co-injection of (E), (E)-Farnesol (**9**) with Sandalwood oil



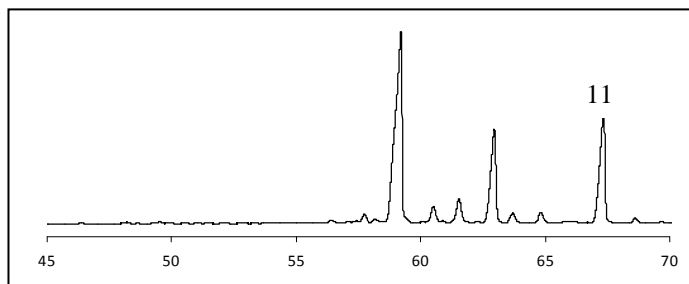

G) Co-injection of (*Z*)-Lanceol (**11**) with Sandalwood oil

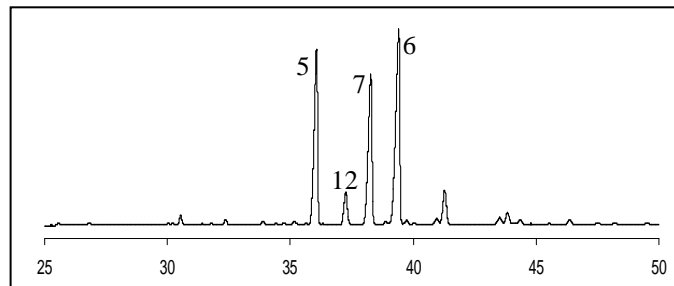

H) Santalenes mixture

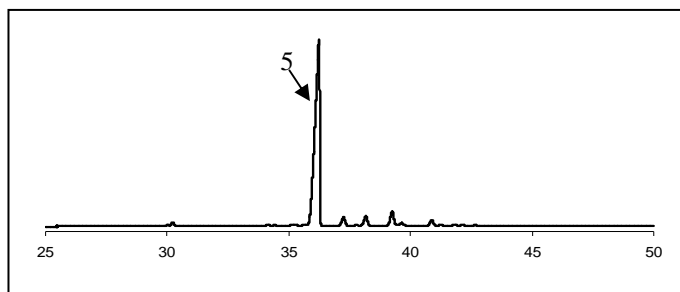

H) Co-injection of  $\alpha$ -Santalene (**5**) with Sandalwood oil.

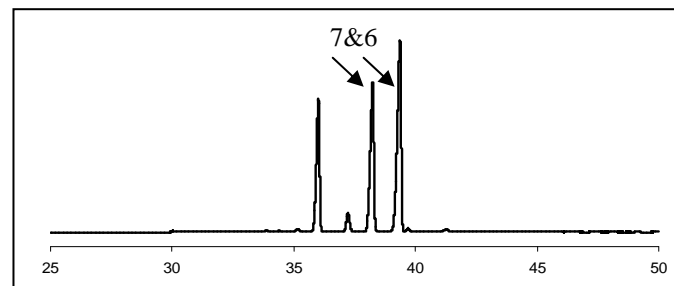

J) Co-injection of ( $\beta$ + *epi*- $\beta$ )-Santalene (**6&7**) with Sandalwood oil
